# Supplementary material for: Psychometric properties of the Norwegian version of the short form of The Problem Areas in Diabetes scale (PAID-5): a validation study
Source: PubMed Central journal article supplement — BMJ Open. 2019 Feb 21;9(2):e022903. doi: 10.1136/bmjopen-2018-022903 (PMC6398631; doi:10.1136/bmjopen-2018-022903), 2019-02-21
Supplement: bmjopen-2018-022903.draft_revisions.pdf [file bmjopen-2018-022903.draft_revisions.pdf]

# BMJ Open

BMJ Open is committed to open peer review. As part of this commitment we make the peer review history of every article we publish publicly available.

When an article is published we post the peer reviewers' comments and the authors' responses online. We also post the versions of the paper that were used during peer review. These are the versions that the peer review comments apply to.

The versions of the paper that follow are the versions that were submitted during the peer review process. They are not the versions of record or the final published versions. They should not be cited or distributed as the published version of this manuscript.

BMJ Open is an open access journal and the full, final, typeset and author-corrected version of record of the manuscript is available on our site with no access controls, subscription charges or pay-per-view fees (<http://bmjopen.bmj.com>).

If you have any questions on BMJ Open's open peer review process please email [editorial.bmjopen@bmj.com](mailto:editorial.bmjopen@bmj.com)

# BMJ Open

## The psychometric properties of the Norwegian version of the short form of The Problem Areas in Diabetes scale (PAID-5) – a validation study

|                               |                                                                                                                                                                                                                                                                                                                                                                                                                                                                                                                                                                                     |
|-------------------------------|-------------------------------------------------------------------------------------------------------------------------------------------------------------------------------------------------------------------------------------------------------------------------------------------------------------------------------------------------------------------------------------------------------------------------------------------------------------------------------------------------------------------------------------------------------------------------------------|
| Journal:                      | <i>BMJ Open</i>                                                                                                                                                                                                                                                                                                                                                                                                                                                                                                                                                                     |
| Manuscript ID                 | bmjopen-2018-022903                                                                                                                                                                                                                                                                                                                                                                                                                                                                                                                                                                 |
| Article Type:                 | Research                                                                                                                                                                                                                                                                                                                                                                                                                                                                                                                                                                            |
| Date Submitted by the Author: | 28-Mar-2018                                                                                                                                                                                                                                                                                                                                                                                                                                                                                                                                                                         |
| Complete List of Authors:     | Vislapuu, Maarja; Hogskulen pa Vestlandet, Department of health and caring sciences<br>Broström, Anders; Hogskulen pa Vestlandet, Department of health and caring sciences ; Jonkoping University, Department of Nursing Science<br>Igland, Jannicke; Faculty of Medicine and Dentistry, University of Bergen, Global Public Health and Primary Care; Hogskulen pa Vestlandet, Center of Evidence-based Practice<br>Vorderstrasse, A; Duke University School of Nursing, School of Nursing<br>Iversen, Marjolein; Hogskulen pa Vestlandet, Department of health and caring sciences |
| Keywords:                     | diabetes, distress, psychometric properties, problem areas in diabetes, validation study                                                                                                                                                                                                                                                                                                                                                                                                                                                                                            |
|                               |                                                                                                                                                                                                                                                                                                                                                                                                                                                                                                                                                                                     |

SCHOLARONE™  
Manuscripts

1  
2  
3  
4  
5  
6  
7  
8  
9  
10  
11  
12  
13  
14  
15  
16  
17  
18  
19  
20  
21  
22  
23  
24  
25  
26  
27  
28  
29  
30  
31  
32  
33  
34  
35  
36  
37  
38  
39  
40  
41  
42  
43  
44  
45  
46  
47  
48  
49  
50  
51  
52  
53  
54  
55  
56  
57  
58  
59  
60

# The psychometric properties of the Norwegian version of the short form of The Problem Areas in Diabetes scale (PAID-5) – a validation study

Maarja Vislapuu<sup>1</sup>, Anders Broström<sup>1,2</sup>, Jannicke Igländ<sup>1,3</sup>, Allison Vorderstrasse<sup>4</sup>, Marjolein M. Iversen<sup>1</sup>

<sup>1</sup>Department of Health and Social Sciences, Institute of Health and caring Science, Western Norway University of Applied Sciences, Bergen, Norway

<sup>2</sup>Department of Nursing Science, School of Health Sciences, Jönköping University, Sweden and Department of Clinical Neurophysiology, Linköping University Hospital, S-58185 Linköping, Sweden Department of Clinical Neurophysiology, University Hospital Linköping, Sweden.

<sup>3</sup>Department of Global Public Health and Primary Care, University of Bergen, Bergen, Norway

<sup>4</sup>Duke School of Nursing, Duke University, Durham, NC, USA

**\*Corresponding author:**

Marjolein M. Iversen, Faculty of Health and Social Science

Department of health and caring sciences

Western Norway University of Applied Sciences

Bergen N-5020, Norway

E-mail: [miv@hvl.no](mailto:miv@hvl.no)

Phone number: +47 902 55 044

## ABSTRACT

**Objectives:** To assess the psychometric properties of the short form of the Problem Areas in Diabetes scale in Norwegian adult patients with type 1 or type 2 diabetes.

**Design:** Cross-sectional survey design.

**Methods:** Participants (n=143) were included consecutively from three Western-Norway endocrinology outpatient clinics. Demographic and clinical data was collected in addition to questionnaires concerning diabetes-related distress, fear of hypoglycemia, symptoms of depression, emotional well-being and perception of general health. Psychometric evaluation of the PAID-5 included confirming its postulated one-factor structure using confirmatory factor analysis; and assessing convergent validity, discriminant validity, internal consistency and test-retest reliability.

**Results:** The confirmatory factor analysis for the PAID-5 scale showed excellent one-factor structure, and there was high internal consistency ( $\alpha=0.89$ ) and good test-retest reliability (ICC=0.81). The PAID-5 correlated positively with fear of hypoglycemia ( $r=0.598$ ) and depression ( $r=0.380$ ) and negatively with emotional well-being ( $r=-0.363$ ) and perception of general health ( $r=-0.420$ ), thus satisfying convergent validity. Patients who had experienced episodes of serious hypoglycemia in the past 6 months had a significantly higher PAID-5 mean score (7.5, SD= 4.95) versus those who had not had these episodes (5.0, SD=4.2, ( $p=0.043$ )). However, its ability to discriminate between groups needs to be tested further in a larger sample.

**Conclusion:** The Norwegian PAID-5 was shown to be a reliable and valid short questionnaire for assessing diabetes-related distress among people with type 1 or type 2 diabetes. The PAID-5 scale can be a particularly valuable screening instrument in outpatient clinics, as its brevity makes it easy to use as a tool for health care professionals in one-on-one consultations. When used in national registries or population health databases it will enable increased knowledge on the prevalence of diabetes-related distress and thus inform guidelines and future interventions.

**Key words:** Diabetes, distress, psychometric properties, Problem Areas in Diabetes

**Strengths and limitations of this study:**

- The psychometric findings provide evidence for a one-factor structure for the PAID-5 scale, enabling the assessment of diabetes-related emotional distress.
- The PAID-5 demonstrated good internal consistency and a stable test-retest reliability among patients with type 1 and type 2 diabetes across three different clinics in Norway.
- The PAID-5 demonstrated positive associations with worry about hypoglycemia and symptoms of depression, as variants of the same construct, and a negative association with the perception of general health and emotional well-being.
- Further testing of the PAID-5's ability to discriminate between different subgroups is required in a larger sample.

## INTRODUCTION

The International Diabetes Federation [1] states that diabetes is one of the largest global health emergencies of the 21st century and that by the year 2045 an estimated 628.6 million people will have diabetes, which is 9.9 % of the total world population. This eruption of diabetes has grown into a health crisis, with a substantial amount of patients not achieving satisfactory metabolic control [2]. The Diabetes Control and Complications Trial showed that inadequate quality of diabetes care contributes to an increased risk for developing a number of serious and disabling health problems among people with type 1 diabetes [3]. The United Kingdom Prospective Diabetes Study showed similar results among people with type 2 diabetes [4].

The daily demands of diabetes, as a chronic disease, have a negative impact not only on physical health, but also on psychological health [5]. The complex nature of diabetes itself, acute fluctuations in blood glucose levels, and the fear of long-term complications lead to high levels of sub-clinical diabetes-specific distress [6]. Diabetes distress is part of the experience of diabetes for many patients over time [7, 8]. Furthermore, even at low levels, diabetes distress has been shown to be related to glycemic control and behavioral management [7, 9]. People with diabetes make far more health management decisions compared to health-care personnel, and the needs of the person with diabetes including attention to emotional distress must be addressed in the clinical setting [2].

The cross-national Diabetes Attitudes, Wishes and Needs (DAWN) study showed that almost half of the study population had a high level of diabetes-related distress [5]. High levels of diabetes-related distress have been linked to medication non-adherence, higher HbA1c, lower self-efficacy and poor dietary and exercise behaviors that lead to poor health outcomes [10]. Diabetes-specific distress should not be confused with general emotional distress and it is also conceptually distinct from major depressive disorder [11].

Screening for diabetes specific distress is important in a clinical setting and has been recommended at key time points in the care pathway such as: diagnosis, annual medical appointments, inpatient episodes, when complications arise and when issues of glycemic control or self-management arise [12]. Therefore, health care personnel need to have validated tools, which can capture the patient's perceived diabetes specific distress. Patient Reported Outcomes (PRO) are directly reported by the patient without any interpretation of the patient's response by health care professionals [13, 14]. Patient reported outcome measures

(PROMs) are important tools to measure the effect of interventions in everyday clinical practice, and to measure if these interventions are appropriate for the patient's needs [15].

## Background

Short and validated measures are needed in clinical care situations. The most commonly used PRO instruments for identifying problematic areas in diabetes and measuring diabetes-related emotional distress are the Problem Areas in Diabetes Scale (PAID-20) and the Diabetes Distress Scale (DDS) [16]. The PAID-20 scale covers a greater variety of emotional concerns, while the Diabetes Distress Scale (DDS) seems to reflect more of distress regarding physician involvement in diabetes treatment [17]. Such questionnaires can be used by health care providers to identify problematic areas in diabetes care and at the same time facilitate the relationship with the health care provider, by creating a two-way discussion and information sharing. The PAID-20 is a valid 20-item scale to measure the overall level of diabetes-related emotional distress, where each item represents a unique area of diabetes-related psychological stress. Higher scores indicate greater emotional diabetes-related distress [18]. The validation study of the PAID-20 questionnaire conducted in Norway showed sufficient reliability and validity among adults with type 1 and type 2 diabetes [19].

A shorter version of the PAID, which has 5 items (PAID-5), was developed as a tool that can be used for rapid screening of diabetes-related distress both in a clinical setting and in research studies [20]. The brevity of the PAID-5 may impose a lower burden on patients with diabetes and represents efforts to increase the clinical usefulness of the original scale [16] as the length and unclear factor structure of the PAID-20 have been identified as shortcomings [11, 16]. The PAID-5 has been validated among people with type 2 diabetes in Korea [21] and among people with type 1 and type 2 diabetes in the multicultural DAWN study [20]. In both studies, the PAID-5 showed good reliability and validity [20, 21]. Research concerning diabetes and its psychological burden has received more focus among researchers, health care providers, and patients in the recent years. The availability of sound instruments is important not only for screening, but in order to compare different cultures and populations on a global basis. The PAID-5 has recently become more widely used in research, because of its brevity. However, there is still limited knowledge of the psychometric properties of the PAID-5 scale, in particular the factor structure of the PAID-5 [16, 20, 21], therefore this needs to be

1  
2  
3 explored.

### 4 5 **Aim**

6  
7 The aim of this study was to examine the psychometric properties of the PAID-5 scale. We  
8 hypothesized that PAID-5 scores would be positively associated with worry about  
9 hypoglycemia and symptoms of depression, as variants of the same construct, and negatively  
10 associated with the perception of general health and emotional well-being. The associations  
11 between PAID-5 scores and demographic (age, gender) and clinical variables (HbA1c,  
12 duration of diabetes, insulin therapy, diabetes-related complications, and episodes of serious  
13 hypoglycemia) were examined and we hypothesized that the PAID-5 scores would  
14 discriminate between diabetes-related emotional distress at a group level for gender, insulin  
15 regimen and presence of diabetes long-term complications. The reliability of the PAID-5 scale  
16 was examined by its internal consistency and test-retest reliability. We also tested the uni-  
17 dimensionality of the PAID-5 questionnaire.  
18  
19  
20  
21  
22  
23  
24  
25  
26  
27

## 28 **METHODS**

### 29 30 **Design, sample and setting**

31  
32 A test-retest survey design was used to collect data from three Western-Norway  
33 endocrinology outpatient clinics between October 2016 and March 2017 by using a  
34 consecutive sampling strategy. To investigate the one-dimensional structure scale with a  
35 confirmatory factor analysis (CFA), a sample size of 140 participants was required with  
36 standard factor loadings on 0.50 [22]. In total, 341 patients who met the inclusion criteria  
37 were invited to participate in the study. We included more participants than needed based on  
38 the power analysis, because of the possibility for a low response rate. Patients were  
39 considered eligible for participation if they were diagnosed with type 1 or type 2 diabetes  
40 more than one year ago, were between 18 and 65 years old, had the mental capacity to  
41 participate, and were able to read and write in Norwegian language. Patients with gestational  
42 diabetes, short life expectancy or terminal illness, and patients who were not able to give  
43 informed consent due to some serious mental illness or cognitive disorder were excluded.  
44  
45  
46  
47  
48  
49  
50  
51

### 52 53 **Data collection procedure**

54 Patients meeting the inclusion criteria received a paper questionnaire by mail, an information  
55 letter, a consent form to accept a repeat (re-test) questionnaire, and two pre-paid envelopes and  
56  
57  
58  
59  
60



1  
2  
3 stamps. To examine the stability of the PAID-5 measurement, the repeat questionnaire was  
4 sent out  $35 \pm 15$  days after the first assessment to those who agreed (n=117).  
5  
6

## 7 **Measures**

8 The questionnaire included questions on demographic- and clinical characteristics: age,  
9 gender, duration of diabetes, diabetes treatment (using insulin and/or oral glucose-lowering  
10 agents), episodes of serious hypoglycemia (needing help from others) in the last 6 months,  
11 and the presence of diabetes long-term complications (cardiovascular diseases, retinopathy  
12 and foot ulcers). The most recent HbA<sub>1c</sub>, taken in close connection to the data collection was  
13 obtained from medical records, as a measure of metabolic control. HbA<sub>1c</sub> values older than 8  
14 weeks prior and more than 12 weeks after filling out the survey were excluded.  
15  
16  
17  
18  
19

20  
21 In this study, the overall question of the RAND-36 scale was used to assess perceptions of  
22 general health (“In general, how would you say your health is?”). Responses were rated on a  
23 Likert scale from 1 (excellent) to 5 (poor). Higher scores indicate poorer health [23].  
24  
25

26 The HAD-scale is a measure for screening symptoms of anxiety and depression [24]. In the  
27 current study, we used only the HADS-D scale with 7 self-report items measuring general  
28 symptoms of depression. Responses are rated on a 4 – point Likert scale from 0 (not a  
29 problem) to 3 (a serious problem). Higher scores indicate higher levels of depressive  
30 symptoms. According to Bjelland et al. [25] the validity of the HAD scale generally has been  
31 good to very good. The Norwegian version of the HAD-scale has shown good psychometric  
32 properties in terms of its two-factor structure, intercorrelation of the subscales (variance of  
33 24-36%) and internal consistency ( $\alpha= 0.73 - 0.85$ ) [26].  
34  
35  
36  
37  
38  
39

40 The WHO-5 questionnaire monitors a person’s level of emotional well-being. This generic  
41 unidimensional instrument includes five positively worded items, rated on a 6 – point Likert  
42 scale. Higher scores indicating better well-being. The WHO-5 questionnaire has shown to be  
43 a psychometrically sound instrument among patients with type 1 and type 2 diabetes in terms  
44 of its one-factor structure, inter-item correlations (0.71 to 0.84), and internal consistency ( $\alpha=$   
45 0.91 and 0.93) [27].  
46  
47  
48  
49

50  
51 The Hypoglycemia Fear Survey II (HFS-II) has two subscales (33 items), one measuring  
52 worry about hypoglycemia and its negative effects (HFS-W) and the other one behavior to  
53 avoid hypoglycemia (HFS-B) [28]. In this study only the HFS-W (18 items) was used, as the  
54 HFS-B has shown a questionable structure [30]. The responses are rated on a 5 – point Likert  
55  
56  
57  
58  
59

1  
2  
3 scale from 0 (never) to 4 (always), with higher scores indicating higher levels of fear related  
4 to hypoglycemia. Internal consistency for the worry scale was satisfactory with a Cronbach's  
5  $\alpha$  of 0.87 [29].  
6  
7

8 The PAID-20 questionnaire provides a total score from 0 – 100, by summing the 0 – 4  
9 responses given for each of the 20 items and multiplying this sum by 1.25 [30]. The PAID-5  
10 contains questions 3, 6, 12, 16 and 19 from the full PAID-20 scale. The scale gives a total  
11 score from 0 to 20. A score of 8 and above indicates a high level of diabetes-related distress  
12 [20] (Table 1).  
13  
14  
15  
16  
17  
18

### 19 **Patient and Public Involvement**

20 Patients and or public were not involved in this work.  
21  
22  
23  
24

### 25 **Data analysis**

26 Descriptive statistics were conducted to describe the sample. A CFA was used to investigate  
27 the factor structure of the PAID-5 scale. Missing data for PAID-5 and PAID-20 scales was  
28 handled by listwise deletion. Model fit was evaluated by inspection of various goodness-of-fit  
29 measures, including model Chi-square ( $\chi^2$ ), degrees of freedom (df) and its associated p-value.  
30 In addition, a goodness-of-fit index (GFI), comparative fit index (CFI), root mean squared error  
31 of approximation (RMSEA) and standardized root mean square residual (SRMR), ratio of chi  
32 square value to the degrees of freedom (CMIN/DF) and normed fit index (NFI) were assessed  
33 [31, 32]. The model was considered to fit the data when the following criteria were satisfied:  
34 RMSEA < 0.08, CFI > 0.95, GFI > 0.90, SRMR < 0.08, CMIN/DF < 3, NFI > 0.95 [31, 32].  
35  
36  
37  
38  
39  
40  
41

42 Convergent validity was assessed by Pearson's correlations [33] to examine the relationships  
43 between diabetes-related emotional distress (PAID-5 scores) and perceived overall health,  
44 emotional well-being (WHO-5), depression (HADS-D), and worry about hypoglycemia (HFS-  
45 W). We also investigated how the PAID-5 scale correlated with the total PAID-20 score.  
46 Discriminant validity assessed whether the PAID-5 scale can differentiate between groups.  
47 Independent samples t-tests were used to compare the mean scores on the PAID-5 for people  
48 with and without diabetes long-term complications, and between type 1 and type 2 diabetes.  
49 Relationships between the PAID-5 score and age, diabetes duration, treatment regimen and  
50 metabolic control (HbA1c) were explored using Pearson correlations.  
51  
52  
53  
54  
55  
56  
57  
58  
59  
60

1  
2  
3 The reliability of the PAID-5 scale was estimated by calculating the internal consistency and  
4 the test-retest reliability. Cronbach's  $\alpha$  was used to determine internal consistency for the  
5 PAID-5 scale total scores and PAID-20 total scores. Test-retest reliability for the PAID-5 scale  
6 was examined by intra-class correlation coefficient [34].  
7  
8

9  
10 Missing substitution with the mean was used for the HAD depression scale when at least 5  
11 items of 7 were answered [35]. For the other questionnaires, when less than 50% was missing,  
12 missing data were replaced with the case mean [36]. Statistical Package for the Social Sciences  
13 (SPSS) version 23.0 and AMOS version 23.0 for Windows were used to analyze the data. A  
14 significance level of 0.05 was used in all analyses.  
15  
16  
17

### 18 19 **Ethical considerations**

20 The National Committee for Medical and Health Research Ethics assessed the application  
21 (2016/1104/REK vest) and approval was obtained from the Norwegian Center for Research  
22 Data (ref.nr. 49383). In addition, approval was obtained from the clinics where the study was  
23 conducted. Informed consent was obtained from the participants.  
24  
25  
26  
27  
28  
29  
30

## 31 **RESULTS**

### 32 **Demographic and clinical data**

33 The questionnaire was returned by 143 patients of 342 yielding a response rate of 42%.  
34 Clinical and demographic characteristics are presented in Table 2. The mean age of the  
35 participants was 48.9 years (SD 11.9) (range 19- 65). The mean HbA1c for the participants  
36 was 7.6 % (SD=1.2). The mean duration of diabetes was 17.9 years (SD 12.9) (range 1 – 54  
37 years). In total, 117 patients (82%) agreed to the second assessment. The non-participants  
38 (n=197) were younger than the participants (mean age 45.15 vs. 48.9, p=0.006), and a larger  
39 proportion was male compared to the participants.  
40  
41  
42  
43  
44  
45  
46

### 47 **Validity**

#### 48 **Construct validity**

49 A CFA for PAID-5 was carried out for 141 patients (Table 3). We hypothesized a one-factor  
50 model for PAID-5. After allowing the correlation between error terms between item 3 and 16,  
51 the overall  $\chi^2 = 6.0$ ,  $df = 4$  with a p-value of 0.195, showed a good model fit. Additional  
52  
53  
54  
55  
56  
57  
58  
59  
60

indices resulted as following: RMSEA = 0.061, CFI = 0.995, GFI = 0.984 and SRMR = 0.024, NFI= 0.984, CMIN/DF=1.51 showing excellent fit.

### **Convergent and discriminant validity**

There was a significant moderate correlation between PAID-5 total score and HFS worry scale ( $r=0.598$ ,  $p < 0.001$ ). There was also a weak positive correlation between PAID-5 scale and HAD depression scale ( $r=0.380$ ,  $p < 0.001$ ). The convergent validity was also confirmed by a negative correlation between PAID-5 and WHO-5 scale ( $r=-0.363$ ,  $p < 0.001$ ) and the perception of general health ( $r=-0.420$ ,  $p < 0.001$ ). The PAID-5 total score also correlated significantly with the PAID-20 total score ( $r=0.923$ ,  $p < 0.001$ ) (Table 4).

There was no significant difference in PAID-5 scores between persons with type 1 diabetes (mean=5.59, SD=4.58) and persons with type 2 diabetes (mean=4.95, SD=3.93,  $p=0.38$ ). There was also no significant difference in PAID-5 mean scores between those who reported having diabetes long-term complications (mean=5.75, SD=0.7) and those not having these complications (mean=5.2, SD=4.4,  $t(140) = 0.61$ ,  $p=0.54$ ). Diabetes-related distress mean scores nearly reached statistical significance when comparing patients who reported having retinopathy (7.2, SD=4.0) versus those without retinopathy (mean=5.1, SD=4.2,  $p=0.06$ ). Although women scored higher on PAID-5 (mean=5.9, SD=4.6) than men (mean=4.86, SD=4.01), the difference was not significant ( $p=0.15$ ).

Patients who had experienced episodes of serious hypoglycemia in the past 6 months had a significantly higher PAID-5 mean score (7.5 (SD= 4.95) versus those who had not had these episodes (5.0, SD=4.2, ( $p=0.043$ ). There were no significant differences between the mean scores of PAID-5 for the three different treatment groups: insulin ( $n=87$ ), oral medication ( $n=28$ ) or both ( $n=27$ ) ( $p=0.90$ ). There were no significant correlations with higher age and longer duration of diabetes. Higher HbA1c was positively correlated with PAID-5 mean scores, but the correlation was weak ( $r=0.14$ ) and not significant ( $p=0.16$ ).

### **Reliability**

#### **Internal consistency and test-retest reliability**

The Cronbach's  $\alpha$  for the PAID-5 scale was 0.89. Inter-item correlations for the PAID-5 scale reached from 0.49 to 0.74. The test-retest of the PAID-5 was conducted for 92 participants, who returned the repeat questionnaire, and resulted in an ICC of 0.81 (95% CI=0.70– 0.87,  $p$

< 0.001).

## DISCUSSION

The results of the current study showed satisfactory psychometric properties of the short form of the Problem Areas in Diabetes scale in Norwegian adult patients with type 1 and type 2 diabetes. Our findings provide evidence for a one-factor structure for the PAID-5 scale, enabling the assessment of diabetes-related emotional distress. The convergent validity was demonstrated by statistically significant moderate correlations with other concept-related PROMs. The PAID-5 scale showed good internal consistency and a stable test-retest reliability among patients with type 1 and type 2 diabetes across three different clinics in Norway. The instrument might be considered as a supplement to guide consultations, or as a screening instrument in registries and/or population health databases enabling increased knowledge on the prevalence of diabetes-related emotional distress and thus inform guidelines for health care professionals and future interventions.

The Norwegian version of the PAID-5 clearly demonstrated a one-factor structure as postulated. The psychometric results in the current study lend support to findings from two previous validation studies on the PAID-5 scale [20, 21]. In Asia, the Korean version of the PAID-5 enabled a one factor model and demonstrated excellent goodness-of-fit indices after the modification with the error of terms between items 3 and 6 [21]. Our CFA among Norwegians showed excellent goodness-of-fit indices after model modification with the covariance of error terms between items 3 and 16. Therefore, it seems that the instrument enables the assessment of diabetes-related emotional distress, although one data driven modification was needed, that may have inflated the model fit.

The present study showed that diabetes-distress (PAID-5) correlated positively with fear of hypoglycemia (HFS) and symptoms of depression (HADS-D), and negatively with emotional well-being (WHO-5) and ones' general health perception (RAND-36), which emphasizes good convergent validity. When diabetes-related stress increases, emotional well-being and perception of ones' general health decreases, as expected [20, 27]. Previously, McGuire et al. [20] demonstrated the relationship between the PAID-5 scale and the WHO-5 scale. However, there is limited evidence showing relationships with concepts of fear of hypoglycemia and

1  
2  
3 symptoms of depression. We demonstrated this in the current study, emphasizing the  
4 usefulness of this brief questionnaire.  
5  
6

7  
8 The PAID-5 scale discriminates well among those who had experienced episodes of serious  
9 hypoglycemia in the past 6 months compared to those who had not had hypoglycemia. The  
10 study population in general experienced a low level of diabetes-related emotional distress, as  
11 the mean score for PAID-5 for the study population was 5.3 (SD=4.3). However, individual  
12 scores ranged from 0–19, indicating that there were patients with a high level of diabetes-  
13 related emotional distress. Relationships between the PAID-5 scale and other subgroups were  
14 weak and non-significant. For example, women scored higher on the PAID-5 scale just as  
15 expected, but this difference was not significant, probably due to the relative small sample  
16 size similar to the previous study conducted in Iceland [38].  
17  
18  
19  
20  
21  
22

23 In the current study, the mean diabetes duration of the study population was 17.1 years and  
24 metabolic control was generally close to the treatment goals, as 50 % of the participants in the  
25 subgroup had a HbA1c value lower than  $\leq 7.3$  % (163 mg/dl). In the current study, the PAID-  
26 5 scale did not discriminate between groups, such as patients with and without diabetes-  
27 related long-term complications. This might be a consequence of the relative low number of  
28 people with complications. Nevertheless, the proportion of diabetes long-term complications  
29 seems reasonable for this patient group and is in line with previous research in Norway [19,  
30 39].  
31  
32  
33  
34  
35  
36

37 Metabolic control (HbA1c measurements) was positively, but only weakly correlated with  
38 PAID-5. This is consistent with results from PAID-20 validation studies, where diabetes-  
39 related emotional distress and glycemic control have shown to be positively correlated - as  
40 diabetes distress increases, HbA1c level also increases [19, 40-42]. Although higher HbA1c  
41 values have been associated with high diabetes-related emotional distress, it should not be  
42 taken as self-evident that patients who are able to maintain an optimum blood sugar feel less  
43 distressed.  
44  
45  
46  
47  
48  
49

50 The short-form of the PAID-20, the PAID-5, showed a good internal consistency and test-  
51 retest reliability. This confirms the assumption previous validation studies made, that the  
52 number of items in the PAID-20 could be reduced [19]. Our findings, and findings in previous  
53 studies of the PAID-5 scale showed good to excellent internal consistency reliability, with  
54  
55  
56  
57  
58  
59  
60

1  
2  
3 Cronbach's  $\alpha$  varying from 0.83 – 0.93 [5, 20, 21, 43] supporting that all items measured the  
4 same construct, diabetes distress.  
5  
6

7  
8 Diabetes, which is a chronic disease, not only involves making health choices in one's  
9 everyday life, but one must also have the ability to see diabetes and its psychological aspects  
10 as a larger and more complex picture with many different challenges throughout life. Diabetes  
11 self-management training is closely connected to how patients understand the nature of the  
12 disease and its management, thus reducing different fears (e.g., fear of hypoglycemia), guilt  
13 and frustration, and at the same time increasing skills in managing diabetes self-care and  
14 medication adherence [6]. When screening patients for diabetes specific distress, it is also  
15 important that health care providers have clear communication strategies and guidelines  
16 emphasizing how to help their patients depending on their level of distress [2]. Goal setting  
17 should be collaborative and support should be team based and interdisciplinary.  
18  
19  
20  
21  
22  
23  
24

### 25 **Limitations**

26 Although the scale has demonstrated good psychometric properties, this study has limitations.  
27 Type of diabetes, and metabolic control (HbA<sub>1c</sub>) were received from the patient's medical  
28 record. However, patients self-reported other clinical characteristics such as diabetes  
29 complications, which may cause inaccuracies [33]. However, patients with diabetes have a  
30 chronic disease, which needs health management decisions every day. Therefore, it is not  
31 unlikely that they are aware of the presence of diabetes complications. Second, the non-  
32 responders were younger than the participants, which calls for caution when interpreting the  
33 results for younger adults with diabetes. Third, the information about the study and the  
34 request for participation was sent by mail. The distribution method in this study has probably  
35 contributed to a relatively low response rate. However, we had enough power to investigate  
36 the one-dimensional structure scale with a CFA. Nevertheless, the sample size restricted us in  
37 determining if the PAID-5 scale has the ability to discriminate between different subgroups.  
38 This needs further research in a larger sample. In spite of these limitations, this cross-sectional  
39 study should provide a valid assessment of the psychometric properties of the short form of  
40 the PAID scale in Norwegian adult patients with type 1 and type 2 diabetes.  
41  
42  
43  
44  
45  
46  
47  
48  
49  
50  
51

### 52 **Conclusions**

53  
54 In conclusion, the findings from this study provide evidence that the Norwegian version of  
55 PAID-5 scale is a reliable and valid instrument for assessing diabetes-related emotional  
56  
57  
58  
59  
60

1  
2  
3 distress among patients with type 1 and type 2 diabetes in Norway, although its ability to  
4 discriminate between groups needs to be tested further in a larger sample. The scale has only  
5 five items and has the potential to guide communication in one-on-one consultations.  
6 Although this validation study was conducted among patients visiting their doctor or a  
7 diabetes nurse in specialist health care, the PAID-5 questionnaire is also relevant to use in  
8 primary health care.  
9  
10  
11  
12  
13

### 14 **Acknowledgements**

15  
16 The author would like to thank the patients who agreed to participate in the study.  
17  
18  
19  
20  
21

### 22 **Funding**

23 The authors received no specific funding for this work.  
24  
25

### 26 **Patient consent**

27 Obtained.  
28  
29  
30

### 31 **Conflict of interest**

32 None declared  
33  
34  
35

### 36 **Contributor ship statement**

37 MV contributed to the study concept, project planning and management, recruitment of  
38 participants, data analysis, manuscript preparation, drafting the manuscript and approved the  
39 final manuscript. AB contributed to the study concept, project planning, manuscript  
40 preparation, drafting the manuscript and approved the final manuscript. JI contributed to data  
41 analysis, manuscript preparation, drafting the manuscript and approved the final manuscript.  
42 AV contributed to the study concept, manuscript preparation, drafting the manuscript, and  
43 approved the final manuscript. MMI contributed to the study concept, project planning and  
44 management, data analysis, manuscript preparation, drafting the manuscript and approved the  
45 final manuscript.  
46  
47  
48  
49  
50  
51  
52

### 53 **Data sharing statement**

54 No additional data available.  
55  
56  
57  
58  
59  
60



## References

1. International Diabetes Federation (2017) *IDF Diabetes Atlas*. 8. edition.
2. Fisher, L., Polonsky, W., Hessler, D., & Potter, M. (2017). A practical framework for encouraging and supporting positive behaviour change in diabetes. *Diabetic Medicine*.
3. Diabetes Control and Complications Trial Research Group (1993). The effect of intensive treatment of diabetes on the development and progression of long-term complications in insulin-dependent diabetes mellitus. *N Engl J Med*, 1993(329), 977-986.
4. UK Prospective Diabetes Study (UKPDS) Group (1998). Intensive blood-glucose control with sulphonylureas or insulin compared with conventional treatment and risk of complications in patients with type 2 diabetes (UKPDS 33). *The lancet*, 352(9131), 837-853.
5. Nicolucci, A., Kovacs Burns, K., Holt, R. I., Comaschi, M., Hermanns, N., Ishii, H., . . . Peyrot, M; DAWN2 Study Group. (2013). Diabetes Attitudes, Wishes and Needs second study (DAWN2): cross-national benchmarking of diabetes-related psychosocial outcomes for people with diabetes. *Diabet Med*, 30(7), 767-777.
6. Rubin, R., & Peyrot, M. (2001). Psychological issues and treatments for people with diabetes. *Journal of Clinical Psychology*, 57(4), 457-478. doi:10.1002/jclp.1041
7. Fisher, L., Gonzalez, J. S., & Polonsky, W. H. (2014). The confusing tale of depression and distress in patients with diabetes: a call for greater clarity and precision. *31*, 764-772.
8. Fisher, L., Skaff, M., Mullan, J., Arean, P., Glasgow, R., & Masharani, U. (2008). A longitudinal study of affective and anxiety disorders, depressive affect and diabetes distress in adults with Type 2 diabetes. *Diabetic Medicine*, 25(9), 1096-1101.
9. Fisher, L., Mullan, J. T., Arean, P., Glasgow, R. E., Hessler, D., & Masharani, U. (2010). Diabetes distress but not clinical depression or depressive symptoms is associated with glycemic control in both cross-sectional and longitudinal analyses. *Diabetes care*, 33(1), 23-28.
10. American Diabetes Association (2016). American Diabetes Association Standards of Medical Care - 2016. *Diabetes care: the journal of clinical and applied research and education*, 39(1).

11. Esbitt, S. A., Tanenbaum, M. L., & Gonzalez, J. S. (2013). *Disentangling Clinical Depression from Diabetes-Specific Distress: Making Sense of the Mess We've Made Screening for depression and other psychological problems in diabetes* (pp. 27-46). London: Springer.
12. Sturt, J., Dennick, K., Due-Christensen, M., McCarthy, K. (2015). The detection and management of diabetes distress in people with type 1 diabetes. *Current diabetes reports*, 15(11): p. 101.
13. Basch, E., Torda, P., & Adams, K. (2013). Standards for patient-reported outcome-based performance measures. *JAMA*, 310(2), 139-140.
14. Snyder, C., Aaronson, N., Choucair, A., Elliott, T., Greenhalgh, J., Halyard, M., . . . Santana, M. (2012). Implementing patient-reported outcomes assessment in clinical practice: a review of the options and considerations. *Quality of Life Research*, 21(8), 1305-1314.
15. Nilsson, E., Orwelius, L., & Kristenson, M. (2016). Patient-reported outcomes in the Swedish National Quality Registers. *Journal of Internal Medicine*, 279, 141-153.
16. Lee, E. H., Lee, Y. W., Lee, K. W., Kim, Y. S., & Nam, M. S. (2014). Measurement of diabetes-related emotional distress using the Problem Areas in Diabetes scale: psychometric evaluations show that the short form is better than the full form. *Health & Quality of Life Outcomes*, 12, 142.
17. Schmitt, A., Reimer, A., Kulzer, B., Haak, T., Ehrmann, D., & Hermanns, N. (2015). How to assess diabetes distress: comparison of the Problem Areas in Diabetes Scale (PAID) and the Diabetes Distress Scale (DDS). *Diabetic Medicine*, 835-843.
18. Polonsky, W. H., Anderson, B. J., Lohrer, P. A., Welch, G., Jacobson, A. M., Aponte, J. E., & Schwartz, C. E. (1995). Assessment of diabetes-related distress. *Diabetes Care*, 18(6), 754-760.
19. Graue, M., Haugstvedt, A., Wentzel-Larsen, T., Iversen, M. M., Karlsen, B., & Rokne, B. (2012). Diabetes-related emotional distress in adults: Reliability and validity of the Norwegian versions of the Problem Areas in Diabetes Scale (PAID) and the Diabetes Distress Scale (DDS). *International Journal of Nursing Studies*, 49(2), 174-182.
20. McGuire, B., Morrison, T., Hermanns, N., Skovlund, S., Eldrup, E., Gagliardino, J., . . . Rodríguez-Saldaña, J. (2010). Short-form measures of diabetes-related emotional distress: the Problem Areas in Diabetes Scale (PAID)-5 and PAID-1. *Diabetologia*, 53(1), 66-69.

- 1
  - 2
  - 3
  - 4
  - 5
  - 6
  - 7
  - 8
  - 9
  - 10
  - 11
  - 12
  - 13
  - 14
  - 15
  - 16
  - 17
  - 18
  - 19
  - 20
  - 21
  - 22
  - 23
  - 24
  - 25
  - 26
  - 27
  - 28
  - 29
  - 30
  - 31
  - 32
  - 33
  - 34
  - 35
  - 36
  - 37
  - 38
  - 39
  - 40
  - 41
  - 42
  - 43
  - 44
  - 45
  - 46
  - 47
  - 48
  - 49
  - 50
  - 51
  - 52
  - 53
  - 54
  - 55
  - 56
  - 57
  - 58
  - 59
  - 60
21. Lee, J., Lee, E.-H., Kim, C.-J., & Moon, S. H. (2015). Diabetes-related emotional distress instruments: A systematic review of measurement properties. *International journal of nursing studies*, 52(12), 1868-1878.
22. Wolf, E. J., Harrington, K. M., Clark, S. L., & Miller, M. W. (2013). Sample size requirements for structural equation models an evaluation of power, bias, and solution propriety. *Educational and Psychological Measurement*, 73(6), 913-934.
23. Hays, R. D., & Morales, L. S. (2001). The RAND-36 measure of health-related quality of life. *Annals of Medicine*, 2001, Vol.33(5), p.350-357, 33(5), 350-357.
24. Zigmond, A. S., & Snaith, R. P. (1983). The hospital anxiety and depression scale. *Acta psychiatrica scandinavica*, 67(6), 361-370.
25. Bjelland, I., Dahl, A.A., Haug, T.T. & Neckelmann, D. (2002). The validity of the Hospital Anxiety and Depression Scale. An updated literature review. *J Psychosom*, 52 (2), 69-77.
26. Mykletun, A., Stordal, E., & Dahl, A. A. (2001). Hospital Anxiety and Depression (HAD) scale: factor structure, item analyses and internal consistency in a large population. *The British journal of psychiatry*, 179(6), 540-544.
27. Hajos, T., Pouwer, F., Skovlund, S., Den Oudsten, B., Geelhoed, D., Duijvestijn, P., Tack, C., & Snoek, F. (2013). Psychometric and screening properties of the WHO-5 well-being index in adult outpatients with Type 1 or Type 2 diabetes mellitus. *Diabetic Medicine*, 30(2), e36 - e69.
28. Gonder-Frederick, L. A., Schmidt, K. M., Vajda, K. A., Greear, M. L., Singh, H., Shepard, J. A., & Cox, D. J. (2011). Psychometric properties of the hypoglycemia fear survey-II for adults with type 1 diabetes. *Diabetes Care*, 34(4), 801-806.
29. Graue, M., Iversen, M. M., Wentzel-Larsen, T., Rokne, B., & Haugstvedt, A. (2013). Assessing fear of hypoglycemia among adults with type 1 diabetes - psychometric properties of the Norwegian version of the Hypoglycemia Fear Survey II questionnaire. *Norsk epidemiologi*, 23(1), 75-81.
30. Welch, G., Weinger, K., Anderson, B. & Polonsky, W.H. (2003). Responsiveness of the Problem Areas In Diabetes (PAID) questionnaire. *Diabetic Medicine*, 20(1), 69-72.
31. Hooper, D., Coughlan, J., & Mullen, M. (2008). Structural equation modelling: Guidelines for determining model fit. *Articles*, 2.

- 1  
2  
3 32. Hu, L., & Bentler, P. M. (1999). Cutoff criteria for fit indexes in covariance structure  
4 analysis: Conventional criteria versus new alternatives. *A Multidisciplinary Journal*,  
5 6(1), 1-55.
- 6  
7 33. Polit, D. F., & Beck, C. T. (2012). *Nursing research: generating and assessing*  
8 *evidence for nursing practice* (9 ed.). Philadelphia, Pa: Wolters Kluwer Health.
- 9  
10  
11  
12 34. Fayers, P. M., & Machin, D. (2007). *Quality of life: the assessment, analysis and*  
13 *interpretation of patient-reported outcomes* (2 ed.). Chichester: John Wiley.
- 14  
15 35. Mykletun, A., E. Stordal, and A.A. Dahl, *Hospital Anxiety and Depression (HAD)*  
16 *scale: factor structure, item analyses and internal consistency in a large population.*  
17 *The British journal of psychiatry*, 2001. **179**(6): p. 540-544.
- 18  
19  
20 36. Polit, D. F. (2010). *Statistics and data analysis for nursing research* (2nd ed.). Upper  
21 Saddle River, N.J: Pearson.
- 22  
23 37. Snoek, F. J., Pouwer, F., Welch, G. W., & Polonsky, W. H. (2000). Diabetes-related  
24 emotional distress in Dutch and U.S. diabetic patients: cross-cultural validity of the  
25 problem areas in diabetes scale. *Diabetes Care*, **23**(9), 1305-1309.
- 26  
27  
28 38. Sigurdardottir, A. K., & Benediktsson, R. (2008). Reliability and validity of the  
29 Icelandic version of the Problem Area In Diabetes (PAID) scale. *International Journal*  
30 *of Nursing Studies*, **45**(4), 526-533.
- 31  
32  
33 39. Iversen, M. M., Midthjell, K., Østbye, T., Tell, G. S., Clipp, E., Sloane, R., . . .  
34 Hanestad, B. R. (2008). History of and factors associated with diabetic foot ulcers in  
35 Norway: the Nord-Trøndelag Health Study. *Scandinavian Journal of Social Medicine*,  
36 **36**(1), 62-68.
- 37  
38  
39 40. Papathanasiou, A., Koutsovasilis, A., Shea, S., Philalithis, A., Papavasiliou, S.,  
41 Melidonis, A., & Lionis, C. (2014). The Problem Areas in Diabetes (PAID) scale:  
42 psychometric evaluation survey in a Greek sample with type 2 diabetes. *Journal of*  
43 *Psychiatric & Mental Health Nursing*, **21**(4), 345-353.
- 44  
45  
46 41. Beléndez, M., Hernández-Mijares, A., Marco, J., Domínguez, J. R., & Pomares, F. J.  
47 (2014). Validation of the Spanish version of the Problem Areas in Diabetes (PAID-SP)  
48 Scale. *Diabetes Research & Clinical Practice*, **106**(3), e93-e95.
- 49  
50  
51 42. Amsberg, S., Wredling, R., Lins, P., Adamson, U., & Johansson, U. (2008). The  
52 psychometric properties of the Swedish version of the Problem Areas in Diabetes  
53 Scale (Swe-PAID-20): scale development. *International Journal of Nursing Studies*,  
54 **45**(9), 1319-1328.
- 55  
56  
57  
58  
59  
60

- 1  
2  
3 43. Nicolucci, A., Rossi, M., Pellegrini, F., Lucisano, G., Pintaudi, B., Gentile, S., . . .  
4 Vespasiani, G. (2014). Benchmarking network for clinical and humanistic outcomes in  
5 diabetes (BENCH-D) study: protocol, tools, and population. *SpringerPlus*, 3(1), 1-9.  
6  
7  
8  
9  
10  
11  
12  
13  
14  
15

16 **Table 1.** Questions included in the PAID-5 questionnaire  
17

| Questions |                                                                                             |
|-----------|---------------------------------------------------------------------------------------------|
| 3         | “Feeling scared when you think about living with diabetes?”                                 |
| 6         | “Feeling depressed when you think about living with diabetes?”                              |
| 12        | “Worrying about the future and the possibility of serious complications?”                   |
| 16        | “Feeling that diabetes is taking up too much of your mental and physical energy every day?” |
| 19        | “Coping with complications of diabetes?”                                                    |

**Table 2.** Demographic and clinical characteristics of the study population

| Characteristics                                         | Total sample |
|---------------------------------------------------------|--------------|
| <i>Demographic variables</i>                            |              |
| Age (years)                                             | 48.9 (11.9)  |
| Male sex n (%)                                          | 78 (54.5)    |
| <i>Clinical variables</i>                               |              |
| Type of diabetes                                        |              |
| Type 1                                                  | 87 (60.8)    |
| Type 2                                                  | 56 (39.2)    |
| HbA <sub>1c</sub> (%) <sup>a, b</sup>                   | 7.6 (1.2)    |
| HbA <sub>1c</sub> (mmol/L) <sup>a, b</sup>              | 60 (13)      |
| Diabetes duration (years)                               | 17.1(12.9)   |
| Type of treatment                                       |              |
| Insulin                                                 | 88 (61.5)    |
| Oral medication                                         | 28 (19.6)    |
| Insulin and oral medication                             | 27 (18.9)    |
| Episodes of serious hypoglycemia                        |              |
| 1-3 times in the past 6 months                          | 16 (11.2)    |
| Self-reported complications n (%)                       |              |
| Presence of one or more late complications <sup>c</sup> | 32 (22.4)    |

Data are shown as *n* (%). Percent of patients with valid values for categorical variables and mean  $\pm$  SD (Standard Deviation) for continuous variables.

<sup>a</sup> HbA<sub>1c</sub> (glycated hemoglobin) measurements were reported using the International Federation of Clinical Chemistry units (mmol/mol) in addition to the derived NGSP units (%)

<sup>b</sup> *n* = 100, HbA<sub>1c</sub> values older than 8 weeks a prior and more than 12 weeks after filling out the survey were excluded.

<sup>c</sup> Retinopathy, cardiovascular diseases or foot ulcers

**Table 3.** Goodness-of-fit indices for the PAID-5 one-factor solutions before and after modification fit

| <i>One-factor model</i> | $\chi^2 (p)$ | <i>Df</i> | <i>CFI</i> | <i>GFI</i> | <i>SRMR</i> | <i>RMSEA</i> | <i>CMIN/DF</i> | <i>NFI</i> |
|-------------------------|--------------|-----------|------------|------------|-------------|--------------|----------------|------------|
| PAID-5                  | 14.85 (0.11) | 5         | 0.974      | 0.961      | 0.035       | 0.119        | 2.971          | 0.962      |
| PAID-5 <sup>a, b</sup>  | 6.0 (0.195)  | 4         | 0.995      | 0.984      | 0.024       | 0.061        | 1.51           | 0.984      |

$\chi^2 (p)$ : Model Chi-Square, Df: degrees of freedom; CFI: comparative fit index (good fit > 0.95). GFI: goodness of fit index (good fit > 0.90); SRMR: standardized root mean square residual (good fit < 0.08). RMSEA: root mean square error of approximation (acceptable fit < 0.08); CMIN/DF: ratio of chi square value to the degrees of freedom (< 3); NFI: normed fit index (good fit > 0.95);

<sup>a</sup> after modification with the covariance of error terms between item 3 and 16.

<sup>b</sup> With standardized factor loadings 0.72 – 0.83.

**Table 4.** Correlations between different standardized questionnaires and PAID-5 (Pearson's bivariate correlation coefficient).

|        | Overall health | WHO-5     | HADS-D   | HSF-W    | PAID-20  |
|--------|----------------|-----------|----------|----------|----------|
| PAID-5 | r=-0.420*      | r=-0.363* | r=0.380* | r=0.598* | r=0.923* |

\* Correlation is significant at the 0.001 level (two tailed)

For peer review only



# BMJ Open

## The psychometric properties of the Norwegian version of the short form of The Problem Areas in Diabetes scale (PAID-5) – a validation study

|                                 |                                                                                                                                                                                                                                                                                                                                                                                                                                                                                                                                                                                    |
|---------------------------------|------------------------------------------------------------------------------------------------------------------------------------------------------------------------------------------------------------------------------------------------------------------------------------------------------------------------------------------------------------------------------------------------------------------------------------------------------------------------------------------------------------------------------------------------------------------------------------|
| Journal:                        | <i>BMJ Open</i>                                                                                                                                                                                                                                                                                                                                                                                                                                                                                                                                                                    |
| Manuscript ID                   | bmjopen-2018-022903.R1                                                                                                                                                                                                                                                                                                                                                                                                                                                                                                                                                             |
| Article Type:                   | Research                                                                                                                                                                                                                                                                                                                                                                                                                                                                                                                                                                           |
| Date Submitted by the Author:   | 25-Aug-2018                                                                                                                                                                                                                                                                                                                                                                                                                                                                                                                                                                        |
| Complete List of Authors:       | Vislapuu, Maarja; Hogskulen pa Vestlandet, Department of health and caring sciences<br>Broström, Anders; Hogskulen pa Vestlandet, Department of health and caring sciences ; Jonkoping University, Department of Nursing Science<br>Igländ, Jannicke; Faculty of Medicine and Dentistry, University of Bergen, Global Public Health and Primary Care; Hogskulen pa Vestlandet, Center of Evidence-based Practice<br>Vorderstrasse, A; New York University, Rory Meyers College of Nursing<br>Iversen, Marjolein; Hogskulen pa Vestlandet, Department of health and caring sciences |
| <b>Primary Subject Heading</b>: | Diabetes and endocrinology                                                                                                                                                                                                                                                                                                                                                                                                                                                                                                                                                         |
| Secondary Subject Heading:      | Diabetes and endocrinology, Research methods, Mental health                                                                                                                                                                                                                                                                                                                                                                                                                                                                                                                        |
| Keywords:                       | diabetes, distress, psychometric properties, problem areas in diabetes, validation study                                                                                                                                                                                                                                                                                                                                                                                                                                                                                           |
|                                 |                                                                                                                                                                                                                                                                                                                                                                                                                                                                                                                                                                                    |

SCHOLARONE™  
Manuscripts

1  
2  
3  
4  
5  
6  
7  
8  
9  
10  
11  
12  
13  
14  
15  
16  
17  
18  
19  
20  
21  
22  
23  
24  
25  
26  
27  
28  
29  
30  
31  
32  
33  
34  
35  
36  
37  
38  
39  
40  
41  
42

# The psychometric properties of the Norwegian version of the short form of The Problem Areas in Diabetes scale (PAID-5) – a validation study

19 Maarja Vislapuu<sup>1</sup>, Anders Broström<sup>1,2</sup>, Jannicke Igländ<sup>1,3</sup>, Allison Vorderstrasse<sup>4</sup>, Marjolein M. Iversen<sup>1</sup>

23  
24  
25  
26  
27  
28  
29  
30  
31  
32  
33  
34  
35  
36  
37  
38  
39  
40  
41  
42

<sup>1</sup>Department of Health and Social Sciences, Institute of Health and caring Science, Western Norway University of Applied Sciences, Bergen, Norway

<sup>2</sup>Department of Nursing Science, School of Health Sciences, Jönköping University, Sweden and Department of Clinical Neurophysiology, Linköping University Hospital, S-58185 Linköping, Sweden Department of Clinical Neurophysiology, University Hospital Linköping, Sweden.

<sup>3</sup>Department of Global Public Health and Primary Care, University of Bergen, Bergen, Norway

<sup>4</sup>New York University Rory Meyers College of Nursing, New York, NY, USA

43  
44  
45  
46  
47  
48  
49  
50  
51  
52  
53  
54  
55  
56  
57  
58  
59  
60

**\*Corresponding author:**

Marjolein M. Iversen, Faculty of Health and Social Science

Department of health and caring sciences

Western Norway University of Applied Sciences

Bergen N-5020, Norway

E-mail: [miv@hvl.no](mailto:miv@hvl.no)

Phone number: +47 902 55 044

## ABSTRACT

**Objectives:** To assess the psychometric properties of the short form of the Problem Areas in Diabetes scale in Norwegian adult patients with type 1 or type 2 diabetes.

**Design:** Cross-sectional survey design.

**Methods:** Participants (n=143) were included consecutively from three Western-Norway endocrinology outpatient clinics. Demographic and clinical data was collected in addition to questionnaires concerning diabetes-related distress, fear of hypoglycemia, symptoms of depression, emotional well-being and perception of general health. Psychometric evaluation of the PAID-5 included confirming its postulated one-factor structure using confirmatory factor analysis; and assessing convergent validity, discriminant validity, internal consistency and test-retest reliability. The retest questionnaire was sent out  $35 \pm 15$  days after the initial assessment to those who agreed (n=117).

**Results:** The confirmatory factor analysis for the PAID-5 scale showed excellent one-factor structure, and there was high internal consistency ( $\alpha=0.89$ ) and good test-retest reliability (ICC=0.81). The PAID-5 correlated positively with fear of hypoglycemia ( $r=0.598$ ) and depression ( $r=0.380$ ) and negatively with emotional well-being ( $r=-0.363$ ) and perception of general health ( $r=-0.420$ ), thus satisfying convergent validity. Patients who had experienced episodes of serious hypoglycemia in the past 6 months had a significantly higher PAID-5 mean score (7.5, SD= 4.95) versus those who had not had these episodes (5.0, SD=4.2, ( $p=0.043$ )). However, its ability to discriminate between groups needs to be tested further in a larger sample.

**Conclusion:** The Norwegian PAID-5 was shown to be a reliable and valid short questionnaire for assessing diabetes-related distress among people with type 1 or type 2 diabetes. However, its ability to discriminate between groups needs to be tested further in larger samples. The PAID-5 scale can be a particularly valuable screening instrument in outpatient clinics, as its brevity makes it easy to use as a tool for health care professionals in one-on-one consultations. This short questionnaire is useful in the national diabetes registry or population cohort studies as it enables increased knowledge on the prevalence of diabetes-related distress.

**Key words:** Diabetes, distress, psychometric properties, Problem Areas in Diabetes

**Strengths and limitations of this study:**

- The Norwegian PAID-5 scale demonstrated good psychometric properties, enabling the assessment of diabetes-related emotional distress.
- The non-responders were younger than the participants, which calls for caution when interpreting the results for younger adults with diabetes.
- The sample size restricted us in determining if the PAID-5 scale has the ability to discriminate between different subgroups.
- Further testing in a larger sample is required.

## INTRODUCTION

The International Diabetes Federation [1] states that diabetes is one of the largest global health emergencies of the 21st century and that by the year 2045 an estimated 628.6 million people will have diabetes, which is 9.9 % of the total world population. In Norway, the prevalence of type 2 diabetes increased from 4.9% to 6.1% between 2009-2014 [2]. After Finland and Sweden, Norway is among the countries with the highest incidence of childhood-onset type 1 diabetes in the world and the average incidence rate was 32.7 per 100,000 person-years from 2004–2012 [3]. The Diabetes Control and Complications Trial showed that inadequate quality of diabetes care contributes to an increased risk for developing a number of serious and disabling health problems among people with type 1 diabetes [4]. The United Kingdom Prospective Diabetes Study showed similar results among people with type 2 diabetes [5].

The daily demands of diabetes, as a chronic disease, have a negative impact not only on physical health, but also on psychological health [6]. The complex nature of diabetes itself, acute fluctuations in blood glucose levels, and the fear of long-term complications lead to high levels of sub-clinical diabetes-specific distress [7]. Diabetes distress is part of the experience of diabetes for many patients over time [8, 9]. Even at low levels, diabetes distress has been shown to be related to glycemic control and behavioral management [8, 10]. People with diabetes make far more health management decisions compared to health-care personnel, and the needs of the person with diabetes including attention to emotional distress must be addressed in the clinical setting [11].

The cross-national Diabetes Attitudes, Wishes and Needs (DAWN) study showed that almost half of the study population had a high level of diabetes-related distress [6]. High levels of diabetes-related distress have been linked to medication non-adherence, higher HbA1c, lower self-efficacy and poor dietary and exercise behaviors that lead to poor health outcomes [12]. Screening for diabetes specific distress is important in a clinical setting and has been recommended at key time points in the care pathway such as: diagnosis, annual medical appointments, inpatient episodes, when complications arise and when issues of glycemic control or self-management arise [13]. Therefore, health care personnel need to have validated tools, which can capture the patient's perceived diabetes specific distress.

The PAID-20 is a valid 20-item scale to measure the overall level of diabetes-related emotional distress, developed in the US [14]. Each item represents a unique area of diabetes-

1  
2  
3 related psychological stress and higher scores indicate greater emotional diabetes-related  
4 distress. The validation study of the PAID-20 questionnaire conducted in Norway showed  
5 sufficient reliability and validity among adults with type 1 and type 2 diabetes [15]. A shorter  
6 version of the PAID, which has 5 items (PAID-5), was developed as a tool that can be used  
7 for rapid screening of diabetes-related distress both in a clinical setting and in research studies  
8 [16]. The brevity of the PAID-5 may impose a lower burden on patients with diabetes and  
9 represents efforts to increase the clinical usefulness of the original scale [17] as the length and  
10 unclear factor structure of the PAID-20 have been identified as shortcomings [17, 18]. The  
11 PAID-5 has been validated among people with type 2 diabetes in Korea [19] and among  
12 people with type 1 and type 2 diabetes in the multicultural DAWN study [16]. In both studies,  
13 the PAID-5 showed good reliability and validity [16, 19]. As research concerning diabetes  
14 and the associated psychological burden continues to receive more attention from researchers,  
15 health care providers, and patients, the availability of sound instruments is important for  
16 screening, and to compare different cultures and populations on a global basis. However, a  
17 questionnaire that is not properly translated and culturally adapted will be a threat to validity  
18 and reliability. Empirical testing of validity and reliability should follow the translation and  
19 cultural adaptation phase [20]. There is still limited knowledge of the psychometric properties  
20 of the PAID-5 scale in Europe, in particular the factor structure of the PAID-5 [16, 17, 19]. As  
21 there is a need for a short diabetes distress questionnaire in the Norwegian Diabetes Registry  
22 for Adults, as well as in population based cohort studies, this needs to be explored.  
23  
24  
25  
26  
27  
28  
29  
30  
31  
32  
33  
34  
35

### 36 **Aim**

37 The aim of this study was to examine the psychometric properties of the PAID-5 scale. We  
38 hypothesized that PAID-5 scores would be positively associated with worry about  
39 hypoglycemia and symptoms of depression, as variants of the same construct, and negatively  
40 associated with the perception of general health and emotional well-being. The associations  
41 between PAID-5 scores and demographic (age, gender) and clinical variables (HbA1c,  
42 duration of diabetes, insulin therapy, diabetes-related complications, and episodes of serious  
43 hypoglycemia) were examined and we hypothesized that the PAID-5 scores would  
44 discriminate between diabetes-related emotional distress at a group level for gender, insulin  
45 regimen and presence of diabetes long-term complications. The reliability of the PAID-5 scale  
46 was examined by its internal consistency and test-retest reliability. We also tested the uni-  
47 dimensionality of the PAID-5 questionnaire.  
48  
49  
50  
51  
52  
53  
54  
55  
56  
57  
58  
59  
60

## METHODS

### Design, sample and setting

A cross-sectional survey design was used to collect data from three Western-Norway endocrinology outpatient clinics between October 2016 and March 2017 by using a consecutive sampling strategy. According to a Monte-Carlo simulation study on estimation of sample size for confirmatory factor analysis (CFA), 190 cases are required for a one-factor model with four items and standardized loadings equal to 0.5, while a model with six items and the same loadings requires a sample size of 90 [21]. Given that the PAID-5 has five items, the minimum required sample size in our study was determined to be between 90 and 190. We included more participants than needed based on the power analysis, because of the possibility for a low response rate. Therefore, 341 patients who met the inclusion criteria were invited to participate in the study. We included more participants than needed based on the power analysis, because of the possibility for a low response rate. Patients were considered eligible for participation if they were diagnosed with type 1 or type 2 diabetes more than one year ago, were between 18 and 65 years old, had the mental capacity to participate, and were able to read and write in Norwegian language. We included only patients diagnosed with type 1 or type 2 diabetes more than one year ago, as patients may have more diabetes distress adapting to living with diabetes in the first year. Patients with gestational diabetes, short life expectancy or terminal illness, and patients who were not able to give informed consent due to some serious mental illness or cognitive disorder were excluded.

### Data collection procedure

Patients meeting the inclusion criteria received the questionnaire (in total 68 questions) by mail, an information letter, a consent form to accept, pre-paid envelopes and stamps. To examine the stability of the PAID-5 measurement, the re-test questionnaire was sent out  $35 \pm 15$  days after the first assessment to those who agreed (n=117).

### Measures

The questionnaire included questions on demographic- and clinical characteristics: age, gender, duration of diabetes, diabetes treatment (using insulin and/or oral glucose-lowering agents), episodes of serious hypoglycemia (needing help from others) in the last 6 months, and the presence of diabetes long-term complications (cardiovascular diseases, retinopathy and foot ulcers). The most recent HbA<sub>1c</sub>, taken in close connection to the data collection was

1  
2  
3 obtained from medical records, as a measure of metabolic control. HbAc1 values older than 8  
4 weeks prior and more than 12 weeks after filling out the survey were excluded.  
5

6  
7 The questionnaire included the overall question of the RAND-36 scale was used to assess  
8 perceptions of general health (“In general, how would you say your health is?”). Responses  
9 were rated on a Likert scale from 1 (excellent) to 5 (poor). Higher scores indicate poorer  
10 health [22].  
11  
12

13  
14 The HAD-scale is a measure for screening symptoms of anxiety and depression [23]. In the  
15 current study, we used only the HADS-D scale with 7 self-report items measuring general  
16 symptoms of depression. Responses are rated on a 4 – point Likert scale from 0 (not a  
17 problem) to 3 (a serious problem). Higher scores indicate higher levels of depressive  
18 symptoms. According to Bjelland et al. [24] the validity of the HAD scale generally has been  
19 good to very good. The Norwegian version of the HAD-scale has shown good psychometric  
20 properties in terms of its two-factor structure, intercorrelation of the subscales (variance of  
21 24-36%) and internal consistency ( $\alpha= 0.73 – 0.85$ ) [25].  
22  
23  
24  
25  
26  
27

28 The WHO-5 questionnaire monitors a person’s level of emotional well-being. This generic  
29 unidimensional instrument includes five positively worded items, rated on a 6 – point Likert  
30 scale. Higher scores indicating better well-being. The WHO-5 questionnaire has shown to be  
31 a psychometrically sound instrument among patients with type 1 and type 2 diabetes in terms  
32 of its one-factor structure, inter-item correlations (0.71 to 0.84), and internal consistency ( $\alpha=$   
33 0.91 and 0.93) [26, 27].  
34  
35  
36  
37  
38

39 The Hypoglycemia Fear Survey II (HFS-II) has two subscales (33 items), one measuring  
40 worry about hypoglycemia and its negative effects (HFS-W) and the other one behavior to  
41 avoid hypoglycemia (HFS-B) [28]. In this study only the HFS-W (18 items) was used, as the  
42 HFS-B has shown a questionable structure [29]. The responses are rated on a 5 – point Likert  
43 scale from 0 (never) to 4 (always), with higher scores indicating higher levels of fear related  
44 to hypoglycemia. Internal consistency for the worry scale was satisfactory with a Cronbach’s  
45  $\alpha$  of 0.87 [30].  
46  
47  
48  
49  
50

51 The PAID-20 questionnaire provides a total score from 0 – 100, by summing the 0 – 4  
52 responses given for each of the 20 items and multiplying this sum by 1.25 [29]. The PAID-5  
53 contains questions 3, 6, 12, 16 and 19 from the full PAID-20 scale. The scale gives a total  
54  
55  
56  
57  
58  
59  
60



score from 0 to 20. A score of 8 and above indicates a high level of diabetes-related distress [16] (Table S1).

### Data analysis

Descriptive statistics were conducted to describe the sample. A CFA with maximum likelihood estimation was used to investigate the factor structure of the PAID-5 scale. Missing data for PAID-5 was handled by listwise deletion in CFA-models, however only two persons had missing data on at least one item. Model fit was evaluated by inspection of various goodness-of-fit measures, including model Chi-square ( $\chi^2$ ), degrees of freedom (df) and its associated p-value. In addition, a goodness-of-fit index (GFI), comparative fit index (CFI), root mean squared error of approximation (RMSEA) and standardized root mean square residual (SRMR), ratio of chi square value to the degrees of freedom (CMIN/DF) and normed fit index (NFI) were assessed [30, 31]. The model was considered to fit the data when the following criteria were satisfied: RMSEA < 0.08, CFI > 0.95, GFI > 0.90, SRMR < 0.08, CMIN/DF < 3, NFI > 0.95 [31, 32].

Convergent validity was assessed by Pearson's correlations [33] to examine the relationships between diabetes-related emotional distress (PAID-5 scores) and perceived overall health, emotional well-being (WHO-5), depression (HADS-D), and worry about hypoglycemia (HFS-W). We also investigated how the PAID-5 scale correlated with the total PAID-20 score. Coefficients in the range 0-0.19 were regarded as very weak, 0.2-0.39 as weak, 0.40-0.59 as moderate, 0.6-0.79 as strong and 0.8-1 as very strong correlation [33]. Discriminant validity assessed whether the PAID-5 scale can differentiate between groups. Independent samples t-tests were used to compare the mean scores on the PAID-5 for people with and without diabetes long-term complications, and between type 1 and type 2 diabetes. Relationships between the PAID-5 score and age, diabetes duration, treatment regimen and metabolic control (HbA1c) were explored using Pearson correlations.

The reliability of the PAID-5 scale was estimated by calculating the internal consistency and the test-retest reliability. Cronbach's  $\alpha$  was used to determine internal consistency for the PAID-5 scale total scores. Test-retest reliability for the PAID-5 scale was examined by intra-class correlation coefficient [34].

1  
2  
3 Missing substitution with the mean was used for the HAD depression scale when at least 5  
4 items of 7 were answered [35]. For the other questionnaires, when less than 50% was missing,  
5 missing data were replaced with the case mean [36]. Statistical Package for the Social Sciences  
6 (SPSS) version 23.0 and AMOS version 23.0 for Windows were used to analyze the data. A  
7 significance level of 0.05 was used in all analyses.  
8  
9  
10

### 11 **Ethical considerations**

12  
13 The National Committee for Medical and Health Research Ethics assessed the application  
14 (2016/1104/REK vest) and approval was obtained from the Norwegian Center for Research  
15 Data (ref.nr. 49383). In addition, approval was obtained from the clinics where the study was  
16 conducted. Informed consent was obtained from the participants.  
17  
18  
19  
20  
21  
22

## 23 **RESULTS**

### 24 **Demographic and clinical data**

25  
26 The questionnaire was returned by 143 patients of 342 yielding a response rate of 42%.  
27 Clinical and demographic characteristics are presented in Table 1. The mean age of the  
28 participants was 48.9 years (SD 11.9) (range 19- 65). The mean HbA1c for the participants  
29 was 7.6 % (60 mmol/mol) (SD=1.2). The mean duration of diabetes was 17.9 years (SD 12.9)  
30 (range 1 – 54 years). In total, 117 patients (82%) agreed to the second assessment. The non-  
31 participants (n=197) were younger than the participants (mean age 45.15 vs. 48.9, p=0.006),  
32 and a larger proportion was male compared to the participants. The mean score for the PAID-  
33 5 in this study sample was 5.3 (SD=4.3) and individual scores ranged from 0–19.  
34  
35  
36  
37  
38  
39  
40

### 41 **Validity**

#### 42 **Construct validity**

43  
44 A CFA for PAID-5 was carried out for 141 patients (Table 2). We hypothesized a one-factor  
45 model for PAID-5. After allowing the correlation between error terms between item 3 and 16,  
46 the overall  $\chi^2 = 6.0$ ,  $df = 4$  with a p-value of 0.195, showed a good model fit. Additional  
47 indices resulted as following: RMSEA = 0.061, CFI = 0.995, GFI = 0.984 and SRMR =  
48 0.024, NFI= 0.984, CMIN/DF=1.51 showing excellent fit.  
49  
50  
51  
52  
53

#### 54 **Convergent and discriminant validity**

1  
2  
3 There was a significant moderate correlation between PAID-5 total score and HFS worry  
4 scale ( $r=0.598$ ,  $p < 0.001$ ). There was also a weak positive correlation between PAID-5 scale  
5 and HAD depression scale ( $r=0.380$ ,  $p < 0.001$ ). The convergent validity was also confirmed  
6 by a negative correlation between PAID-5 and WHO-5 scale ( $r=-0.363$ ,  $p < 0.001$ ) and the  
7 perception of general health ( $r=-0.420$ ,  $p < 0.001$ ). The PAID-5 total score also correlated  
8 significantly with the PAID-20 total score ( $r=0.923$ ,  $p < 0.001$ ).  
9  
10  
11  
12

13  
14 There was no significant difference in PAID-5 scores between persons with type 1 diabetes  
15 (mean=5.59, SD=4.58) and persons with type 2 diabetes (mean=4.95, SD=3.93,  $p=0.38$ ).  
16 There was also no significant difference in PAID-5 mean scores between those who reported  
17 having diabetes long-term complications (mean=5.75, SD=0.7) and those not having these  
18 complications (mean=5.2, SD=4.4,  $t(140)=0.61$ ,  $p=0.54$ ). Diabetes-related distress mean  
19 scores nearly reached statistical significance when comparing patients who reported having  
20 retinopathy (7.2, SD=4.0) versus those without retinopathy (mean=5.1, SD=4.2,  $p=0.06$ ).  
21 Although women scored higher on PAID-5 (mean=5.9, SD=4.6) than men (mean=4.86,  
22 SD=4.01), the difference was not significant ( $p=0.15$ ).  
23  
24  
25  
26  
27  
28  
29

30 Patients who had experienced episodes of serious hypoglycemia in the past 6 months had a  
31 significantly higher PAID-5 mean score (7.5 (SD= 4.95) versus those who had not had these  
32 episodes (5.0, SD=4.2, ( $p=0.043$ ). There were no significant differences between the mean  
33 scores of PAID-5 for the three different treatment groups: insulin ( $n=87$ ), oral medication  
34 ( $n=28$ ) or both ( $n=27$ ) ( $p=0.90$ ). There were no significant correlations with higher age and  
35 longer duration of diabetes. Higher HbA1c was positively correlated with PAID-5 mean  
36 scores, but the correlation was weak ( $r=0.14$ ) and not significant ( $p=0.16$ ).  
37  
38  
39  
40  
41  
42

## 43 **Reliability**

### 44 **Internal consistency and test-retest reliability**

45 The Cronbach's  $\alpha$  for the PAID-5 scale was 0.89. Inter-item correlations for the PAID-5 scale  
46 reached from 0.49 to 0.74. The test-retest of the PAID-5 was conducted for 92 participants,  
47 who returned the repeat questionnaire, and resulted in an ICC of 0.81 (95% CI=0.70– 0.87,  $p$   
48  $< 0.001$ ).  
49  
50  
51  
52  
53  
54  
55

## 56 **DISCUSSION**

1  
2  
3 The results of the current study showed satisfactory psychometric properties of the short form  
4 of the PAID-5 in Norwegian adult patients with type 1 and type 2 diabetes. Our findings  
5 provide evidence for a one-factor structure for the PAID-5 scale, enabling the assessment of  
6 diabetes-related emotional distress. The convergent validity was demonstrated by statistically  
7 significant moderate correlations with other concept-related PROMs. The PAID-5 scale  
8 showed good internal consistency and a stable test-retest reliability among patients with type  
9 1 and type 2 diabetes across three different clinics in Norway. The instrument might be  
10 considered as a supplement to guide consultations, or as a screening instrument in registries  
11 and/or population health databases enabling increased knowledge on the prevalence of  
12 diabetes-related emotional distress and thus inform guidelines for health care professionals  
13 and future interventions.  
14  
15  
16  
17  
18  
19  
20  
21

22 The Norwegian version of the PAID-5 clearly demonstrated a one-factor structure as  
23 postulated. The psychometric results in the current study lend support to findings from two  
24 previous validation studies on the PAID-5 scale [16, 19]. In Asia, the Korean version of the  
25 PAID-5 enabled a one factor model and demonstrated excellent goodness-of-fit indices after  
26 the modification with the error of terms between items 3 and 6 [17]. Our CFA among  
27 Norwegians showed excellent goodness-of-fit indices after model modification with the  
28 covariance of error terms between items 3 and 16. Therefore, it seems that the instrument  
29 enables the assessment of diabetes-related emotional distress, although one data driven  
30 modification was needed, that may have inflated the model fit.  
31  
32  
33  
34  
35  
36  
37

38 The present study showed that PAID-5 correlated positively with fear of hypoglycemia (HFS)  
39 and symptoms of depression (HADS-D), and negatively with emotional well-being (WHO-5)  
40 and ones' general health perception (RAND-36), which emphasizes good convergent validity.  
41 When diabetes-related stress increases, emotional well-being and perception of ones' general  
42 health decreases, as expected [16, 26, 27]. Previously, McGuire et al. [16] demonstrated the  
43 relationship between the PAID-5 scale and the WHO-5 scale. However, there is limited  
44 evidence showing relationships with concepts of fear of hypoglycemia and symptoms of  
45 depression. We demonstrated this in the current study, emphasizing the usefulness of this  
46 brief questionnaire.  
47  
48  
49  
50  
51  
52  
53

54 The PAID-5 scale discriminates well among those who had experienced episodes of serious  
55 hypoglycemia in the past 6 months compared to those who had not had hypoglycemia. The  
56  
57  
58

1  
2  
3 study population in general experienced a low level of diabetes-related emotional distress, as  
4 the mean score for PAID-5 for the study population was 5.3 (SD=4.3). However, individual  
5 scores ranged from 0–19, indicating that there were patients with a high level of diabetes-  
6 related emotional distress. Relationships between the PAID-5 scale and other subgroups were  
7 weak and non-significant. For example, women scored higher on the PAID-5 scale just as  
8 expected, but this difference was not significant, probably due to the relative small sample  
9 size similar to the previous study conducted in Iceland [37]. There were no significant  
10 differences between the mean scores of PAID-5 for the three different treatment groups  
11 (insulin, oral medication or both) ( $p=0.90$ ). Our relatively small sample size might be the  
12 reason, but it is also possible that type of treatment is not the main reason for a higher burden  
13 of diabetes distress. On the other hand, a higher HbA1c (as a measure of metabolic control),  
14 might be a better marker as higher HbA1c was positively correlated with PAID-5 mean scores  
15 in this study (NS) as well as in previous research [15]. However, future studies specifically  
16 designed to answer these questions (e.g., by use of stratified sampling or by using latent class  
17 analyses) with large sample sizes are needed to test for discrimination between different  
18 subgroups.

19  
20  
21 In the current study, the mean diabetes duration of the study population was 17.1 years and  
22 metabolic control was generally close to the treatment goals, as 50 % of the participants in the  
23 subgroup had a HbA1c value lower than  $\leq 7.3$  % (56 mmol/mol). In the current study, the  
24 PAID-5 scale did not discriminate between groups, such as patients with and without  
25 diabetes-related long-term complications. This might be a consequence of the relative low  
26 number of people with complications. Nevertheless, the proportion of diabetes long-term  
27 complications seems reasonable for this patient group and is in line with previous research in  
28 Norway [15, 38].

29  
30  
31 Metabolic control (HbA1c measurements) was positively, but only weakly correlated with  
32 PAID-5. This is consistent with results from PAID-20 validation studies, where diabetes-  
33 related emotional distress and glycaemic control have shown to be positively correlated - as  
34 diabetes distress increases, HbA1c level also increases [15, 39-41]. Although higher HbA1c  
35 values have been associated with high diabetes-related emotional distress, it should not be  
36 taken as self-evident that patients who are able to maintain an optimum blood sugar feel less  
37 distressed.

1  
2  
3 The short-form of the PAID-20, the PAID-5, showed a good internal consistency and test-  
4 retest reliability. This confirms the assumption previous validation studies made, that the  
5 number of items in the PAID-20 could be reduced [15]. Our findings, and findings in previous  
6 studies of the PAID-5 scale showed good to excellent internal consistency reliability, with  
7 Cronbach's  $\alpha$  varying from 0.83 – 0.93 [6, 16, 19, 42] supporting that all items measured the  
8 same construct, diabetes distress.  
9  
10  
11  
12  
13

14 Diabetes, which is a chronic disease, not only involves making health choices in one's  
15 everyday life, but one must also have the ability to see diabetes and its psychological aspects  
16 as a larger and more complex picture with many different challenges throughout life. Diabetes  
17 self-management training is closely connected to how patients understand the nature of the  
18 disease and its management, thus reducing different fears (e.g., fear of hypoglycemia), guilt  
19 and frustration, and at the same time increasing skills in managing diabetes self-care and  
20 medication adherence [7].  
21  
22  
23  
24  
25  
26

### 27 **Strengths and limitations**

28 In this well-defined sample of patients across three clinics, the Norwegian PAID-5 was shown  
29 to be a reliable and valid short questionnaire for assessing diabetes-related distress among  
30 people with type 1 or type 2 diabetes. Although the scale has demonstrated good  
31 psychometric properties, this study has limitations. Type of diabetes, and metabolic control  
32 ( $HbA_{1c}$ ) were received from the patient's medical record. However, other clinical  
33 characteristics such as diabetes complications were self-reported by the patient, which may  
34 cause inaccuracies [33]. Second, the non-responders were younger than the participants,  
35 which calls for caution when interpreting the results for younger adults with diabetes. Third,  
36 the information about the study and the request for participation was sent by mail. The  
37 distribution method in this study has probably contributed to a relatively low response rate.  
38 However, we had enough power to investigate the one-dimensional structure scale with a  
39 CFA. Nevertheless, the sample size restricted us in determining if the PAID-5 scale has the  
40 ability to discriminate between different subgroups. This needs further research in a larger  
41 sample. In spite of these limitations, this cross-sectional study should provide a valid  
42 assessment of the psychometric properties of the short form of the PAID scale in Norwegian  
43 adult patients with type 1 and type 2 diabetes.  
44  
45  
46  
47  
48  
49  
50  
51  
52  
53  
54

### 55 **Conclusions**

1  
2  
3 In conclusion, the findings from this study provide evidence that the Norwegian version of  
4 PAID-5 scale is a reliable and valid instrument for assessing diabetes-related emotional  
5 distress among patients with type 1 and type 2 diabetes in Norway, although its ability to  
6 discriminate between groups needs to be tested further in a larger sample. The scale has only  
7 five items and has the potential to guide communication in one-on-one consultations.  
8 Although this validation study was conducted among patients visiting their doctor or a  
9 diabetes nurse in specialist health care, the PAID-5 questionnaire is also relevant to use in  
10 primary health care.  
11  
12  
13  
14  
15

### 16 **Acknowledgements**

17  
18 The author would like to thank the patients who agreed to participate in the study.  
19  
20  
21  
22  
23  
24

### 25 **Funding**

26 The authors received no specific funding for this work.  
27  
28  
29

### 30 **Patient consent**

31 Obtained.  
32  
33  
34

### 35 **Conflict of interest**

36 None declared  
37  
38  
39

### 40 **Contributor ship statement**

41 MV contributed to the study concept, project planning and management, recruitment of  
42 participants, data analysis, manuscript preparation, drafting the manuscript and approved the  
43 final manuscript. AB contributed to the study concept, project planning, manuscript  
44 preparation, drafting the manuscript and approved the final manuscript. JI contributed to data  
45 analysis, manuscript preparation, drafting the manuscript and approved the final manuscript.  
46 AV contributed to the study concept, manuscript preparation, drafting the manuscript, and  
47 approved the final manuscript. MMI contributed to the study concept, project planning and  
48 management, data analysis, manuscript preparation, drafting the manuscript and approved the  
49 final manuscript.  
50  
51  
52  
53  
54  
55  
56  
57  
58  
59  
60

### Data sharing statement

No additional data available.

### References

1. International Diabetes Federation (2017) *IDF Diabetes Atlas*. 8. edition.
2. Ruiz PL, Stene LC, Bakken IJ, Håberg SE, Birkeland KI, Gulseth HL. Decreasing incidence of pharmacologically and non-pharmacologically treated type 2 diabetes in Norway: a nationwide study. *Diabetologia*. 2018:1-9.
3. Skrivarhaug T, Stene LC, Drivvoll AK, Strøm H, Joner G, Group NCDS. Incidence of type 1 diabetes in Norway among children aged 0–14 years between 1989 and 2012: has the incidence stopped rising? Results from the Norwegian Childhood Diabetes Registry. *Diabetologia*. 2014;57(1):57-62
4. Diabetes Control and Complications Trial Research Group (1993). The effect of intensive treatment of diabetes on the development and progression of long-term complications in insulin-dependent diabetes mellitus. *N Engl J Med*, 1993(329), 977-986.
5. UK Prospective Diabetes Study (UKPDS) Group (1998). Intensive blood-glucose control with sulphonylureas or insulin compared with conventional treatment and risk of complications in patients with type 2 diabetes (UKPDS 33). *The lancet*, 352(9131), 837-853.
6. Nicolucci, A., Kovacs Burns, K., Holt, R. I., Comaschi, M., Hermanns, N., Ishii, H., . . . Peyrot, M; DAWN2 Study Group. (2013). Diabetes Attitudes, Wishes and Needs second study (DAWN2): cross-national benchmarking of diabetes-related psychosocial outcomes for people with diabetes. *Diabet Med*, 30(7), 767-777.
7. Rubin, R., & Peyrot, M. (2001). Psychological issues and treatments for people with diabetes. *Journal of Clinical Psychology*, 57(4), 457-478. doi:10.1002/jclp.1041
8. Fisher, L., Gonzalez, J. S., & Polonsky, W. H. (2014). The confusing tale of depression and distress in patients with diabetes: a call for greater clarity and precision. *31*, 764-772.
9. Fisher, L., Skaff, M., Mullan, J., Arean, P., Glasgow, R., & Masharani, U. (2008). A longitudinal study of affective and anxiety disorders, depressive affect and diabetes distress in adults with Type 2 diabetes. *Diabetic Medicine*, 25(9), 1096-1101.



10. Fisher, L., Mullan, J. T., Arean, P., Glasgow, R. E., Hessler, D., & Masharani, U. (2010). Diabetes distress but not clinical depression or depressive symptoms is associated with glycemic control in both cross-sectional and longitudinal analyses. *Diabetes care*, 33(1), 23-28.
11. Fisher, L., Polonsky, W., Hessler, D. & Potter, M. (2017). A practical framework for encouraging and supporting positive behaviour change in diabetes. *Diabetic Medicine*.
12. American Diabetes Association (2016). American Diabetes Association Standards of Medical Care - 2016. *Diabetes care: the journal of clinical and applied research and education*, 39(1).
13. Sturt, J., Dennick, K., Due-Christensen, M., McCarthy, K. (2015). The detection and management of diabetes distress in people with type 1 diabetes. *Current diabetes reports*, 15(11): p. 101.
14. Polonsky, W. H., Anderson, B. J., Lohrer, P. A., Welch, G., Jacobson, A. M., Aponte, J. E., & Schwartz, C. E. (1995). Assessment of diabetes-related distress. *Diabetes Care*, 18(6), 754-760.
15. Graue, M., Haugstvedt, A., Wentzel-Larsen, T., Iversen, M. M., Karlsen, B., & Rokne, B. (2012). Diabetes-related emotional distress in adults: Reliability and validity of the Norwegian versions of the Problem Areas in Diabetes Scale (PAID) and the Diabetes Distress Scale (DDS). *International Journal of Nursing Studies*, 49(2), 174-182.
16. McGuire, B., Morrison, T., Hermanns, N., Skovlund, S., Eldrup, E., Gagliardino, J., . . . Rodríguez-Saldaña, J. (2010). Short-form measures of diabetes-related emotional distress: the Problem Areas in Diabetes Scale (PAID)-5 and PAID-1. *Diabetologia*, 53(1), 66-69.
17. Lee, E. H., Lee, Y. W., Lee, K. W., Kim, Y. S., & Nam, M. S. (2014). Measurement of diabetes-related emotional distress using the Problem Areas in Diabetes scale: psychometric evaluations show that the short form is better than the full form. *Health & Quality of Life Outcomes*, 12, 142.
18. Esbitt, S. A., Tanenbaum, M. L., & Gonzalez, J. S. (2013). Disentangling Clinical Depression from Diabetes-Specific Distress: Making Sense of the Mess We've Made *Screening for depression and other psychological problems in diabetes* (pp. 27-46). London: Springer.
19. Lee, J., Lee, E.-H., Kim, C.-J., & Moon, S. H. (2015). Diabetes-related emotional distress instruments: A systematic review of measurement properties. *International journal of nursing studies*, 52(12), 1868-1878.

- 1
  - 2
  - 3
  - 4
  - 5
  - 6
  - 7
  - 8
  - 9
  - 10
  - 11
  - 12
  - 13
  - 14
  - 15
  - 16
  - 17
  - 18
  - 19
  - 20
  - 21
  - 22
  - 23
  - 24
  - 25
  - 26
  - 27
  - 28
  - 29
  - 30
  - 31
  - 32
  - 33
  - 34
  - 35
  - 36
  - 37
  - 38
  - 39
  - 40
  - 41
  - 42
  - 43
  - 44
  - 45
  - 46
  - 47
  - 48
  - 49
  - 50
  - 51
  - 52
  - 53
  - 54
  - 55
  - 56
  - 57
  - 58
  - 59
  - 60
20. Thulin LBB, Iversen MM, Hanestad BR. Translation and cultural adaptation of audit of diabetes dependence quality of life (ADDQoL) into Norwegian. *Vård I Norden*. 2008;28(2):53-6.
21. Wolf, E. J., Harrington, K. M., Clark, S. L., & Miller, M. W. (2013). Sample size requirements for structural equation models an evaluation of power, bias, and solution propriety. *Educational and Psychological Measurement*, 73(6), 913-934.
22. Hays, R. D., & Morales, L. S. (2001). The RAND-36 measure of health-related quality of life. *Annals of Medicine*, 2001, Vol.33(5), p.350-357, 33(5), 350-357.
23. Zigmond, A. S., & Snaith, R. P. (1983). The hospital anxiety and depression scale. *Acta psychiatrica scandinavica*, 67(6), 361-370.
24. Bjelland, I., Dahl, A.A., Haug, T.T. & Neckelmann, D. (2002). The validity of the Hospital Anxiety and Depression Scale. An updated literature review. *J Psychosom*, 52 (2), 69-77.
25. Mykletun, A., Stordal, E., & Dahl, A. A. (2001). Hospital Anxiety and Depression (HAD) scale: factor structure, item analyses and internal consistency in a large population. *The British journal of psychiatry*, 179(6), 540-544.
26. Hajos, T., Pouwer, F., Skovlund, S., Den Oudsten, B., Geelhoed-Duijvestijn, P., Tack, C., & Snoek, F. (2013). Psychometric and screening properties of the WHO-5 well-being index in adult outpatients with Type 1 or Type 2 diabetes mellitus. *Diabetic Medicine*, 30(2), e36 - e69.
27. Topp CW, Ostergaard SD, Sondergaard S, Bech P. The WHO-5 Well-Being Index: a systematic review of the literature. *Psychother Psychosom* 2015; 84: 167-176
28. Gonder-Frederick, L. A., Schmidt, K. M., Vajda, K. A., Greear, M. L., Singh, H., Shepard, J. A., & Cox, D. J. (2011). Psychometric properties of the hypoglycemia fear survey-II for adults with type 1 diabetes. *Diabetes Care*, 34(4), 801-806.
29. Welch, G., Weinger, K., Anderson, B. & Polonsky, W.H. (2003). Responsiveness of the Problem Areas In Diabetes (PAID) questionnaire. *Diabetic Medicine*, 20(1), 69-72.
30. Graue, M., Iversen, M. M., Wentzel-Larsen, T., Rokne, B., & Haugstvedt, A. (2013). Assessing fear of hypoglycemia among adults with type 1 diabetes - psychometric properties of the Norwegian version of the Hypoglycemia Fear Survey II questionnaire. *Norsk epidemiologi*, 23(1), 75-81.
31. Hooper, D., Coughlan, J., & Mullen, M. (2008). Structural equation modelling: Guidelines for determining model fit. *Articles*, 2.

- 1  
2  
3 32. Hu, L., & Bentler, P. M. (1999). Cutoff criteria for fit indexes in covariance structure  
4 analysis: Conventional criteria versus new alternatives. *A Multidisciplinary Journal*,  
5 6(1), 1-55.
- 6  
7 33. Polit, D. F., & Beck, C. T. (2012). *Nursing research: generating and assessing*  
8 *evidence for nursing practice* (9 ed.). Philadelphia, Pa: Wolters Kluwer Health.
- 9  
10  
11  
12 34. Fayers, P. M., & Machin, D. (2007). *Quality of life: the assessment, analysis and*  
13 *interpretation of patient-reported outcomes* (2 ed.). Chichester: John Wiley.
- 14  
15 35. Mykletun, A., E. Stordal, and A.A. Dahl, *Hospital Anxiety and Depression (HAD)*  
16 *scale: factor structure, item analyses and internal consistency in a large population.*  
17 *The British journal of psychiatry*, 2001. 179(6): p. 540-544.
- 18  
19  
20 36. Polit, D. F. (2010). *Statistics and data analysis for nursing research* (2nd ed.). Upper  
21 Saddle River, N.J: Pearson.
- 22  
23  
24 37. Sigurdardottir, A. K., & Benediktsson, R. (2008). Reliability and validity of the  
25 Icelandic version of the Problem Area In Diabetes (PAID) scale. *International Journal*  
26 *of Nursing Studies*, 45(4), 526-533.
- 27  
28 38. Iversen, M. M., Midthjell, K., Østbye, T., Tell, G. S., Clipp, E., Sloane, R., . . .  
29 Hanestad, B. R. (2008). History of and factors associated with diabetic foot ulcers in  
30 Norway: the Nord-Trøndelag Health Study. *Scandinavian Journal of Social Medicine*,  
31 36(1), 62-68.
- 32  
33  
34 39. Papatnasiou, A., Koutsovasilis, A., Shea, S., Philalithis, A., Papavasiliou, S.,  
35 Melidonis, A., & Lionis, C. (2014). The Problem Areas in Diabetes (PAID) scale:  
36 psychometric evaluation survey in a Greek sample with type 2 diabetes. *Journal of*  
37 *Psychiatric & Mental Health Nursing*, 21(4), 345-353.
- 38  
39  
40 40. Beléndez, M., Hernández-Mijares, A., Marco, J., Domínguez, J. R., & Pomares, F. J.  
41 (2014). Validation of the Spanish version of the Problem Areas in Diabetes (PAID-SP)  
42 Scale. *Diabetes Research & Clinical Practice*, 106(3), e93-e95.
- 43  
44  
45 41. Amsberg, S., Wredling, R., Lins, P., Adamson, U., & Johansson, U. (2008). The  
46 psychometric properties of the Swedish version of the Problem Areas in Diabetes  
47 Scale (Swe-PAID-20): scale development. *International Journal of Nursing Studies*,  
48 45(9), 1319-1328.
- 49  
50  
51 42. Nicolucci, A., Rossi, M., Pellegrini, F., Lucisano, G., Pintaudi, B., Gentile, S., . . .  
52 Vespasiani, G. (2014). Benchmarking network for clinical and humanistic outcomes in  
53 diabetes (BENCH-D) study: protocol, tools, and population. *SpringerPlus*, 3(1), 1-9.
- 54  
55  
56  
57  
58  
59  
60

1  
2  
3  
4  
5  
6  
7  
8  
9  
10  
11  
12  
13  
14  
15  
16  
17  
18  
19  
20  
21  
22  
23  
24  
25  
26  
27  
28  
29  
30  
31  
32  
33  
34  
35  
36  
37  
38  
39  
40  
41  
42  
43  
44  
45  
46  
47  
48  
49  
50  
51  
52  
53  
54  
55  
56  
57  
58  
59  
60

For peer review only

**Table 1.** Demographic and clinical characteristics of the study population

| Characteristics                                         | Total sample |
|---------------------------------------------------------|--------------|
| <i>Demographic variables</i>                            |              |
| Age (years)                                             | 48.9 (11.9)  |
| Male sex n                                              | 78 (54.5)    |
| <i>Clinical variables</i>                               |              |
| Type of diabetes                                        |              |
| Type 1                                                  | 87 (60.8)    |
| Type 2                                                  | 56 (39.2)    |
| HbA <sub>1c</sub> (%) <sup>a, b</sup>                   | 7.6 (1.2)    |
| HbA <sub>1c</sub> (mmol/mol) <sup>a, b</sup>            | 60 (13)      |
| Diabetes duration (years)                               | 17.1(12.9)   |
| Type of treatment                                       |              |
| Insulin                                                 | 88 (61.5)    |
| Oral medication                                         | 28 (19.6)    |
| Insulin and oral medication                             | 27 (18.9)    |
| Episodes of serious hypoglycemia                        |              |
| 1-3 times in the past 6 months                          | 16 (11.2)    |
| Self-reported complications                             |              |
| Presence of one or more late complications <sup>c</sup> | 32 (22.4)    |

Data are shown as *n* (%). Percent of patients with valid values for categorical variables and mean ± SD (Standard Deviation) for continuous variables.

<sup>a</sup> HbA<sub>1c</sub> (glycated hemoglobin) measurements were reported using the International Federation of Clinical Chemistry units (mmol/mol) in addition to the derived NGSP units (%)

<sup>b</sup> *n* = 100, HbA<sub>1c</sub> values older than 8 weeks a prior and more than 12 weeks after filling out the survey were excluded.

<sup>c</sup> Retinopathy, cardiovascular diseases or foot ulcers

**Table 2.** Factor loadings and goodness-of-fit indices for the PAID-5 one-factor solutions

|                       | Model 1      | Model 2     |
|-----------------------|--------------|-------------|
| Standardized loadings |              |             |
| Item 3                | 0.83         | 0.85        |
| Item 6                | 0.86         | 0.85        |
| Item 12               | 0.82         | 0.80        |
| Item 16               | 0.68         | 0.72        |
| Item 19               | 0.73         | 0.72        |
| AVE                   | 0.62         | 0.63        |
| Composite reliability | 0.76         | 0.76        |
| Df                    | 5            | 4           |
| $\chi^2$ (p)          | 14.85 (0.11) | 6.0 (0.195) |
| CFI                   | 0.974        | 0.995       |
| GFI                   | 0.961        | 0.984       |
| SRMR                  | 0.035        | 0.024       |
| RMSEA                 | 0.119        | 0.061       |
| CMIN/DF               | 2.971        | 1.51        |
| NFI                   | 0.962        | 0.984       |

Model 1: One-factor CFA, Model 2: One-factor CFA with covariance of error terms between item 3 and 16  
 $\chi^2$  (p): Model Chi-Square, Df: degrees of freedom; CFI: comparative fit index (good fit > 0.95). GFI: goodness of fit index (good fit > 0.90); SRMR: standardized root mean square residual (good fit < 0.08). RMSEA: root mean square error of approximation (acceptable fit < 0.08); CMIN/DF: ratio of chi square value to the degrees of freedom (< 3); NFI: normed fit index (good fit > 0.95);

**Table S1.** Questions included in the PAID-5 questionnaire

| Questions |                                                                                             |
|-----------|---------------------------------------------------------------------------------------------|
| 3         | “Feeling scared when you think about living with diabetes?”                                 |
| 6         | “Feeling depressed when you think about living with diabetes?”                              |
| 12        | “Worrying about the future and the possibility of serious complications?”                   |
| 16        | “Feeling that diabetes is taking up too much of your mental and physical energy every day?” |
| 19        | “Coping with complications of diabetes?”                                                    |

For peer review only

## STROBE Statement—checklist of items that should be included in reports of observational studies

|                              | Item No | Recommendation                                                                                                                                                                                                                                                                                                                                                                                                                                                         | Page No |
|------------------------------|---------|------------------------------------------------------------------------------------------------------------------------------------------------------------------------------------------------------------------------------------------------------------------------------------------------------------------------------------------------------------------------------------------------------------------------------------------------------------------------|---------|
| <b>Title and abstract</b>    | 1       | (a) Indicate the study's design with a commonly used term in the title or the abstract                                                                                                                                                                                                                                                                                                                                                                                 | 1       |
|                              |         | (b) Provide in the abstract an informative and balanced summary of what was done and what was found                                                                                                                                                                                                                                                                                                                                                                    | 2       |
| <b>Introduction</b>          |         |                                                                                                                                                                                                                                                                                                                                                                                                                                                                        |         |
| Background/rationale         | 2       | Explain the scientific background and rationale for the investigation being reported                                                                                                                                                                                                                                                                                                                                                                                   | 4-5     |
| Objectives                   | 3       | State specific objectives, including any prespecified hypotheses                                                                                                                                                                                                                                                                                                                                                                                                       | 5       |
| <b>Methods</b>               |         |                                                                                                                                                                                                                                                                                                                                                                                                                                                                        |         |
| Study design                 | 4       | Present key elements of study design early in the paper                                                                                                                                                                                                                                                                                                                                                                                                                | 5       |
| Setting                      | 5       | Describe the setting, locations, and relevant dates, including periods of recruitment, exposure, follow-up, and data collection                                                                                                                                                                                                                                                                                                                                        | 6-7     |
| Participants                 | 6       | (a) <i>Cohort study</i> —Give the eligibility criteria, and the sources and methods of selection of participants. Describe methods of follow-up<br><i>Case-control study</i> —Give the eligibility criteria, and the sources and methods of case ascertainment and control selection. Give the rationale for the choice of cases and controls<br><i>Cross-sectional study</i> —Give the eligibility criteria, and the sources and methods of selection of participants | 6       |
|                              |         | (b) <i>Cohort study</i> —For matched studies, give matching criteria and number of exposed and unexposed<br><i>Case-control study</i> —For matched studies, give matching criteria and the number of controls per case                                                                                                                                                                                                                                                 |         |
| Variables                    | 7       | Clearly define all outcomes, exposures, predictors, potential confounders, and effect modifiers. Give diagnostic criteria, if applicable                                                                                                                                                                                                                                                                                                                               | 6-7     |
| Data sources/<br>measurement | 8*      | For each variable of interest, give sources of data and details of methods of assessment (measurement). Describe comparability of assessment methods if there is more than one group                                                                                                                                                                                                                                                                                   | 6-7     |
| Bias                         | 9       | Describe any efforts to address potential sources of bias                                                                                                                                                                                                                                                                                                                                                                                                              | 6-7     |
| Study size                   | 10      | Explain how the study size was arrived at                                                                                                                                                                                                                                                                                                                                                                                                                              | 6       |
| Quantitative variables       | 11      | Explain how quantitative variables were handled in the analyses. If applicable, describe which groupings were chosen and why                                                                                                                                                                                                                                                                                                                                           | 8       |
| Statistical methods          | 12      | (a) Describe all statistical methods, including those used to control for confounding                                                                                                                                                                                                                                                                                                                                                                                  |         |
|                              |         | (b) Describe any methods used to examine subgroups and interactions                                                                                                                                                                                                                                                                                                                                                                                                    | 8       |
|                              |         | (c) Explain how missing data were addressed                                                                                                                                                                                                                                                                                                                                                                                                                            | 8       |
|                              |         | (d) <i>Cohort study</i> —If applicable, explain how loss to follow-up was addressed<br><i>Case-control study</i> —If applicable, explain how matching of cases and controls was addressed<br><i>Cross-sectional study</i> —If applicable, describe analytical methods taking account of sampling strategy                                                                                                                                                              | 6       |
|                              |         | (e) Describe any sensitivity analyses                                                                                                                                                                                                                                                                                                                                                                                                                                  |         |



| <b>Results</b>           |     |                                                                                                                                                                                                                                                                                                                                                                                                               |       |
|--------------------------|-----|---------------------------------------------------------------------------------------------------------------------------------------------------------------------------------------------------------------------------------------------------------------------------------------------------------------------------------------------------------------------------------------------------------------|-------|
| Participants             | 13* | (a) Report numbers of individuals at each stage of study—eg numbers potentially eligible, examined for eligibility, confirmed eligible, included in the study, completing follow-up, and analysed<br>(b) Give reasons for non-participation at each stage<br>(c) Consider use of a flow diagram                                                                                                               | 9     |
| Descriptive data         | 14* | (a) Give characteristics of study participants (eg demographic, clinical, social) and information on exposures and potential confounders<br>(b) Indicate number of participants with missing data for each variable of interest<br>(c) <i>Cohort study</i> —Summarise follow-up time (eg, average and total amount)                                                                                           | 9     |
| Outcome data             | 15* | <i>Cohort study</i> —Report numbers of outcome events or summary measures over time<br><i>Case-control study</i> —Report numbers in each exposure category, or summary measures of exposure<br><i>Cross-sectional study</i> —Report numbers of outcome events or summary measures                                                                                                                             | 9-10  |
| Main results             | 16  | (a) Give unadjusted estimates and, if applicable, confounder-adjusted estimates and their precision (eg, 95% confidence interval). Make clear which confounders were adjusted for and why they were included<br>(b) Report category boundaries when continuous variables were categorized<br>(c) If relevant, consider translating estimates of relative risk into absolute risk for a meaningful time period | 9-10  |
| Other analyses           | 17  | Report other analyses done—eg analyses of subgroups and interactions, and sensitivity analyses                                                                                                                                                                                                                                                                                                                |       |
| <b>Discussion</b>        |     |                                                                                                                                                                                                                                                                                                                                                                                                               |       |
| Key results              | 18  | Summarise key results with reference to study objectives                                                                                                                                                                                                                                                                                                                                                      | 10-11 |
| Limitations              | 19  | Discuss limitations of the study, taking into account sources of potential bias or imprecision. Discuss both direction and magnitude of any potential bias                                                                                                                                                                                                                                                    | 13    |
| Interpretation           | 20  | Give a cautious overall interpretation of results considering objectives, limitations, multiplicity of analyses, results from similar studies, and other relevant evidence                                                                                                                                                                                                                                    | 13    |
| Generalisability         | 21  | Discuss the generalisability (external validity) of the study results                                                                                                                                                                                                                                                                                                                                         | 12-13 |
| <b>Other information</b> |     |                                                                                                                                                                                                                                                                                                                                                                                                               |       |
| Funding                  | 22  | Give the source of funding and the role of the funders for the present study and, if applicable, for the original study on which the present article is based                                                                                                                                                                                                                                                 | 14    |

\*Give information separately for cases and controls in case-control studies and, if applicable, for exposed and unexposed groups in cohort and cross-sectional studies.

**Note:** An Explanation and Elaboration article discusses each checklist item and gives methodological background and published examples of transparent reporting. The STROBE checklist is best used in conjunction with this article (freely available on the Web sites of PLoS Medicine at <http://www.plosmedicine.org/>, Annals of Internal Medicine at <http://www.annals.org/>, and Epidemiology at <http://www.epidem.com/>). Information on the STROBE Initiative is available at [www.strobe-statement.org](http://www.strobe-statement.org).

# BMJ Open

## The psychometric properties of the Norwegian version of the short form of The Problem Areas in Diabetes scale (PAID-5) – a validation study

|                                 |                                                                                                                                                                                                                                                                                                                                                                                                                                                                                                                                                                                    |
|---------------------------------|------------------------------------------------------------------------------------------------------------------------------------------------------------------------------------------------------------------------------------------------------------------------------------------------------------------------------------------------------------------------------------------------------------------------------------------------------------------------------------------------------------------------------------------------------------------------------------|
| Journal:                        | <i>BMJ Open</i>                                                                                                                                                                                                                                                                                                                                                                                                                                                                                                                                                                    |
| Manuscript ID                   | bmjopen-2018-022903.R2                                                                                                                                                                                                                                                                                                                                                                                                                                                                                                                                                             |
| Article Type:                   | Research                                                                                                                                                                                                                                                                                                                                                                                                                                                                                                                                                                           |
| Date Submitted by the Author:   | 08-Nov-2018                                                                                                                                                                                                                                                                                                                                                                                                                                                                                                                                                                        |
| Complete List of Authors:       | Vislapuu, Maarja; Hogskulen pa Vestlandet, Department of health and caring sciences<br>Broström, Anders; Hogskulen pa Vestlandet, Department of health and caring sciences ; Jonkoping University, Department of Nursing Science<br>Iglund, Jannicke; Faculty of Medicine and Dentistry, University of Bergen, Global Public Health and Primary Care; Hogskulen pa Vestlandet, Center of Evidence-based Practice<br>Vorderstrasse, A; New York University, Rory Meyers College of Nursing<br>Iversen, Marjolein; Hogskulen pa Vestlandet, Department of health and caring sciences |
| <b>Primary Subject Heading</b>: | Diabetes and endocrinology                                                                                                                                                                                                                                                                                                                                                                                                                                                                                                                                                         |
| Secondary Subject Heading:      | Diabetes and endocrinology, Research methods, Mental health                                                                                                                                                                                                                                                                                                                                                                                                                                                                                                                        |
| Keywords:                       | diabetes, distress, psychometric properties, problem areas in diabetes, validation study                                                                                                                                                                                                                                                                                                                                                                                                                                                                                           |
|                                 |                                                                                                                                                                                                                                                                                                                                                                                                                                                                                                                                                                                    |

SCHOLARONE™  
Manuscripts

1  
2  
3  
4 The psychometric properties of the Norwegian  
5  
6  
7 version of the short form of The Problem  
8  
9  
10 Areas in Diabetes scale (PAID-5) – a  
11  
12  
13  
14 validation study  
15  
16  
17  
18  
19

20 Maarja Vislapuu<sup>1</sup>, Anders Broström<sup>1,2</sup>, Jannicke Igland<sup>1,3</sup>, Allison Vorderstrasse<sup>4</sup>, Marjolein  
21 M. Iversen<sup>1</sup>  
22  
23

24  
25  
26 <sup>1</sup>Department of Health and Social Sciences, Institute of Health and caring Science, Western  
27 Norway University of Applied Sciences, Bergen, Norway  
28

29 <sup>2</sup> Department of Nursing Science, School of Health Sciences, Jönköping University, Sweden  
30 and Department of Clinical Neurophysiology, Linköping University Hospital, S-58185  
31 Linköping, Sweden Department of Clinical Neurophysiology, University Hospital Linköping,  
32 Sweden  
33  
34

35  
36 <sup>3</sup> Department of Global Public Health and Primary Care, University of Bergen, Bergen,  
37 Norway  
38

39 <sup>4</sup> New York University Rory Meyers College of Nursing, New York, NY, USA  
40  
41  
42  
43  
44  
45

46 **\*Corresponding author:**

47 Marjolein M. Iversen, Faculty of Health and Social Science

48 Department of health and caring sciences

49 Western Norway University of Applied Sciences

50 Bergen N-5020, Norway

51 E-mail: [miv@hvl.no](mailto:miv@hvl.no)

52 Phone number: +47 902 55 044  
53  
54  
55  
56  
57  
58  
59  
60

## ABSTRACT

**Objectives:** To assess the psychometric properties of the short form of the Problem Areas in Diabetes scale in Norwegian adult patients with type 1 or type 2 diabetes.

**Design:** Cross-sectional survey design.

**Methods:** Participants (n=143) were included from three Western-Norway endocrinology outpatient clinics. Demographic and clinical data were collected in addition to questionnaires concerning diabetes-related distress, fear of hypoglycemia, symptoms of depression, emotional well-being and perception of general health. Psychometric evaluation of the PAID-5 included confirming its postulated one-factor structure using confirmatory factor analysis; and assessing convergent validity, discriminant validity, internal consistency and test-retest reliability. The retest questionnaire was sent out  $35 \pm 15$  days after the initial assessment to those who agreed (n=117).

**Results:** The confirmatory factor analysis for the PAID-5 scale showed excellent one-factor structure, and there was high internal consistency ( $\alpha=0.89$ ) and good test-retest reliability (ICC=0.81). The PAID-5 correlated positively with fear of hypoglycemia ( $r=0.598$ ) and depression ( $r=0.380$ ) and negatively with emotional well-being ( $r=-0.363$ ) and perception of general health ( $r=-0.420$ ), thus satisfying convergent validity. Patients who had experienced episodes of serious hypoglycemia in the past 6 months had a significantly higher PAID-5 mean score (7.5, SD= 4.95) than those who had not had these episodes (5.0, SD=4.2, ( $p=0.043$ )). However, its ability to discriminate between groups needs to be tested further in a larger sample.

**Conclusion:** The Norwegian PAID-5 was shown to be a reliable and valid short questionnaire for assessing diabetes-related distress among people with type 1 or type 2 diabetes. However, its ability to discriminate between groups needs to be tested further in larger samples. The PAID-5 scale can be a particularly valuable screening instrument in outpatient clinics, as its brevity makes it easy to use as a tool in patient-provider encounters. This short questionnaire is useful in the national diabetes registry or population cohort studies as

1  
2  
3 it enables increased knowledge regarding the prevalence of diabetes-related distress.  
4  
5  
6

7 **Key words:** Diabetes, distress, psychometric properties, Problem Areas in Diabetes  
8  
9  
10

11  
12 **Strengths and limitations of this study:**  
13

- 14  
15 - The Norwegian PAID-5 scale demonstrated good psychometric properties, enabling  
16 the assessment of diabetes-related emotional distress.  
17  
18 - The non-responders were younger than the participants, which calls for caution when  
19 interpreting the results for younger adults with diabetes.  
20  
21 - The sample size restricted us in determining if the PAID-5 scale has the ability to  
22 discriminate between different subgroups.  
23  
24 - Further testing in a larger sample is required.  
25  
26  
27  
28  
29  
30  
31  
32  
33  
34  
35  
36  
37  
38  
39  
40  
41  
42  
43  
44  
45  
46  
47  
48  
49  
50  
51  
52  
53  
54  
55  
56  
57  
58  
59  
60

## INTRODUCTION

The International Diabetes Federation [1] states that diabetes is one of the largest global health emergencies of the 21st century and that by the year 2045 an estimated 628.6 million people will have diabetes, which is 9.9 % of the total world population. In Norway, the prevalence of type 2 diabetes increased from 4.9% to 6.1% between 2009-2014 [2]. After Finland and Sweden, Norway is among the countries with the highest incidence of childhood-onset type 1 diabetes in the world and the average incidence rate was 32.7 per 100,000 person-years from 2004–2012 [3]. The Diabetes Control and Complications Trial showed that inadequate quality of diabetes care contributes to an increased risk for developing a number of serious and disabling health problems among people with type 1 diabetes [4]. The United Kingdom Prospective Diabetes Study showed similar results among people with type 2 diabetes [5].

The daily demands of diabetes, as a chronic disease, have a negative impact not only on physical health, but also on psychological health [6]. The complex nature of diabetes itself, acute fluctuations in blood glucose levels, and the fear of long-term complications lead to high levels of sub-clinical diabetes-specific distress [7]. Diabetes distress is part of the experience of diabetes for many patients over time [8, 9]. Even at low levels, diabetes distress has been shown to be related to glycemic control and behavioral management [8, 10]. People with diabetes make far more health management decisions compared to healthcare personnel, and the needs of the person with diabetes including attention to emotional distress must be addressed in the clinical setting [11].

The cross-national Diabetes Attitudes, Wishes and Needs (DAWN) study showed that almost half of the study population had a high level of diabetes-related distress [6]. High levels of diabetes-related distress have been linked to medication non-adherence, higher HbA1c, lower self-efficacy and poor dietary and exercise behaviors that lead to poor health outcomes [12]. Screening for diabetes specific distress is important in a clinical setting and has been recommended at key time points in the care pathway such as: diagnosis, annual medical appointments, inpatient episodes, when complications arise and when issues of glycemic control or self-management arise [13]. Therefore, health care personnel need to have validated tools to assess patients' perceived diabetes specific distress.

The PAID-20 is a valid 20-item scale to measure the overall level of diabetes-related emotional distress, developed in the US [14]. Each item represents a unique area of diabetes-related psychological stress and higher scores indicate greater emotional diabetes-related distress. The

1  
2  
3 validation study of the PAID-20 questionnaire conducted in Norway showed sufficient  
4 reliability and validity among adults with type 1 and type 2 diabetes [15]. A shorter version of  
5 the PAID, which has 5 items (PAID-5), was developed as a tool that can be used for rapid  
6 screening of diabetes-related distress both in a clinical setting and in research studies [16]. The  
7 brevity of the PAID-5 may impose a lower burden on patients with diabetes and represents  
8 efforts to increase the clinical usefulness of the original scale [17] as the length and unclear  
9 factor structure of the PAID-20 have been identified as shortcomings [17, 18]. The PAID-5 has  
10 been validated among people with type 2 diabetes in Korea [19] and among people with type 1  
11 and type 2 diabetes in the multicultural DAWN study [16]. In both studies, the PAID-5 showed  
12 good reliability and validity [16, 19]. As research concerning diabetes and the associated  
13 psychological burden continues to receive more attention from researchers, health care  
14 providers, and patients, the availability of sound instruments is important for screening, and to  
15 compare different cultures and populations on a global basis. However, a questionnaire that is  
16 not properly translated and culturally adapted will be a threat to validity and reliability.  
17 Empirical testing of validity and reliability should follow the translation and cultural adaptation  
18 phase [20]. There is still limited knowledge of the psychometric properties of the PAID-5 scale  
19 in Europe, in particular the factor structure of the PAID-5 [16, 17, 19]. As there is a need for a  
20 short diabetes distress questionnaire in the Norwegian Diabetes Registry for Adults, as well as  
21 in population based cohort studies, this needs to be explored.

### 36 **Aim**

37  
38 The aim of this study was to examine the psychometric properties of the PAID-5 scale. We  
39 hypothesized that PAID-5 scores would be positively associated with worry about  
40 hypoglycemia and symptoms of depression, as variants of the same construct, and negatively  
41 associated with the perception of general health and emotional well-being. The associations  
42 between PAID-5 scores and demographic (age, gender) and clinical variables (HbA1c, duration  
43 of diabetes, insulin therapy, diabetes-related complications, and episodes of serious  
44 hypoglycemia) were examined. We hypothesized that the PAID-5 scores would discriminate  
45 between diabetes-related emotional distress at a group level for gender, insulin regimen and  
46 presence of diabetes long-term complications. The reliability of the PAID-5 scale was examined  
47 by its internal consistency and test-retest reliability. We also tested the uni-dimensionality of  
48 the PAID-5 questionnaire.

## METHODS

### Design, sample and setting

A cross-sectional survey design was used to collect data from three Western-Norway endocrinology outpatient clinics between October 2016 and March 2017 by using a consecutive sampling strategy. According to a Monte-Carlo simulation study on estimation of sample size for confirmatory factor analysis (CFA), 190 cases are required for a one-factor model with four items and standardized loadings equal to 0.5, while a model with six items and the same loadings requires a sample size of 90 [21]. Given that the PAID-5 has five items, the minimum required sample size in our study was determined to be between 90 and 190. We included more participants than needed based on the power analysis, because of the possibility for a low response rate. Therefore, 341 patients who met the inclusion criteria were invited to participate in the study. Patients were considered eligible for participation if they were diagnosed with type 1 or type 2 diabetes more than one year ago, were between 18 and 65 years old, had the mental capacity to participate, and were able to read and write in Norwegian language. We included only patients diagnosed with type 1 or type 2 diabetes more than one year ago, as patients may have more diabetes distress adapting to living with diabetes in the first year. Patients with gestational diabetes, short life expectancy or terminal illness, and patients who were not able to give informed consent due to some serious mental illness or cognitive disorder were excluded.

### Data collection procedure

Patients meeting the inclusion criteria received the questionnaire (68 questions in total) by mail, an information letter, a consent form to accept, pre-paid envelopes and stamps. To examine the stability of the PAID-5 measurement, the re-test questionnaire was sent out  $35 \pm 15$  days after the first assessment to those who agreed (n=117).

### Measures

The questionnaire included questions on demographic- and clinical characteristics: age, gender, duration of diabetes, diabetes treatment (using insulin and/or oral glucose-lowering agents), episodes of serious hypoglycemia (needing help from others) in the last 6 months,



1  
2  
3 and the presence of diabetes long-term complications (cardiovascular diseases, retinopathy  
4 and foot ulcers). The most recent HbA<sub>1c</sub>, taken in close connection to the data collection was  
5 obtained from medical records, as a measure of metabolic control. HbA<sub>1c</sub> values older than 8  
6 weeks prior and more than 12 weeks after filling out the survey were excluded.  
7  
8  
9

10  
11 The questionnaire included the overall question of the RAND-36 scale to assess perceptions of  
12 general health (“In general, how would you say your health is?”). Responses were rated on a  
13 Likert scale from 1 (excellent) to 5 (poor). Higher scores indicate poorer health [22].  
14  
15

16  
17 The HAD-scale is a measure for screening symptoms of anxiety and depression [23]. In the  
18 current study, we used only the HADS-D scale with 7 self-report items measuring general  
19 symptoms of depression. Responses are rated on a 4 – point Likert scale from 0 (not a problem)  
20 to 3 (a serious problem). Higher scores indicate higher levels of depressive symptoms.  
21 According to Bjelland et al. [24] the validity of the HAD scale generally has been good to very  
22 good. The Norwegian version of the HAD-scale has shown good psychometric properties in  
23 terms of its two-factor structure, intercorrelation of the subscales (variance of 24-36%) and  
24 internal consistency ( $\alpha= 0.73 - 0.85$ ) [25].  
25  
26  
27  
28  
29  
30

31  
32 The WHO-5 questionnaire monitors a person’s level of emotional well-being. This generic  
33 unidimensional instrument includes five positively worded items, rated on a 6 – point Likert  
34 scale. Higher scores indicate better well-being. The WHO-5 questionnaire has been shown to  
35 be a psychometrically sound instrument among patients with type 1 and type 2 diabetes in terms  
36 of its one-factor structure, inter-item correlations (0.71 to 0.84), and internal consistency ( $\alpha=$   
37 0.91 and 0.93) [26, 27].  
38  
39  
40  
41  
42

43 The Hypoglycemia Fear Survey II (HFS-II) has two subscales (33 items), one measuring worry  
44 about hypoglycemia and its negative effects (HFS-W) and the other one behavior to avoid  
45 hypoglycemia (HFS-B) [28]. In this study only the HFS-W (18 items) was used, as the HFS-B  
46 has shown a questionable structure [29]. The responses are rated on a 5 – point Likert scale  
47 from 0 (never) to 4 (always), with higher scores indicating higher levels of fear related to  
48 hypoglycemia. Internal consistency for the worry scale was satisfactory with a Cronbach’s  $\alpha$  of  
49 0.87 [30].  
50  
51  
52  
53  
54

55  
56 The PAID-20 questionnaire provides a total score from 0 – 100, by summing the 0 – 4 responses  
57 given for each of the 20 items and multiplying this sum by 1.25 [29]. The PAID-5 contains  
58  
59  
60

1  
2  
3 questions 3, 6, 12, 16 and 19 from the full PAID-20 scale. The scale gives a total score from 0  
4 to 20. A score of 8 and above indicates a high level of diabetes-related distress [16] (Table S1).  
5  
6  
7

### 8 9 **Data analysis**

10 Descriptive statistics were conducted to describe the sample. A CFA with maximum likelihood  
11 estimation was used to investigate the factor structure of the PAID-5 scale. Missing data for  
12 PAID-5 was handled by listwise deletion in CFA-models, however only two persons had missing  
13 data on at least one item. Model fit was evaluated by inspection of various goodness-of-fit  
14 measures, including model Chi-square ( $\chi^2$ ), degrees of freedom (df) and associated p-values. In  
15 addition, a goodness-of-fit index (GFI), comparative fit index (CFI), root mean squared error of  
16 approximation (RMSEA) and standardized root mean square residual (SRMR), ratio of chi  
17 square value to the degrees of freedom (CMIN/DF) and normed fit index (NFI) were assessed  
18 [30, 31]. The model was considered to fit the data when the following criteria were satisfied:  
19 RMSEA < 0.08, CFI > 0.95, GFI > 0.90, SRMR < 0.08, CMIN/DF < 3, NFI > 0.95 [31, 32].  
20  
21  
22  
23  
24  
25  
26  
27  
28

29 Convergent validity was assessed by Pearson's correlations [33] to examine the relationships  
30 between diabetes-related emotional distress (PAID-5 scores) and perceived overall health,  
31 emotional well-being (WHO-5), depression (HADS-D), and worry about hypoglycemia (HFS-  
32 W). We also investigated how the PAID-5 scale correlated with the total PAID-20 score.  
33 Coefficients in the range of 0-0.19 were regarded as very weak, 0.2-0.39 as weak, 0.40-0.59 as  
34 moderate, 0.6-0.79 as strong and 0.8-1 as very strong correlation [33]. Discriminant validity  
35 assessed whether the PAID-5 scale can differentiate between groups. Independent samples t-tests  
36 were used to compare the mean scores on the PAID-5 for people with and without diabetes long-  
37 term complications, and between type 1 and type 2 diabetes. Relationships between the PAID-5  
38 score and age, diabetes duration, treatment regimen and metabolic control (HbA1c) were  
39 explored using Pearson correlations.  
40  
41  
42  
43  
44  
45  
46  
47  
48

49 The reliability of the PAID-5 scale was estimated by calculating the internal consistency and the  
50 test-retest reliability. Cronbach's  $\alpha$  was used to determine internal consistency for the PAID-5  
51 scale total scores. Test-retest reliability for the PAID-5 scale was examined by intra-class  
52 correlation coefficient [34].  
53  
54  
55  
56

57 Missing substitution with the mean was used for the HAD depression scale when at least 5 items  
58 of 7 were answered [35]. For all other questionnaires, when less than 50% was missing, missing  
59  
60

1  
2  
3 data were replaced with the case mean [36]. Statistical Package for the Social Sciences (SPSS)  
4 version 23.0 and AMOS version 23.0 for Windows were used to analyze the data. A significance  
5 level of 0.05 was used in all analyses.  
6  
7

### 8 9 **Ethical considerations**

10 The National Committee for Medical and Health Research Ethics assessed the application  
11 (2016/1104/REK vest) and approval was obtained from the Norwegian Center for Research  
12 Data (ref.nr. 49383). In addition, approval was obtained from the clinics where the study was  
13 conducted. Informed consent was obtained from the participants.  
14  
15  
16  
17

### 18 19 **Patient and Public Involvement**

20 Patients and or public were not involved in setting the research questions or planning the  
21 study. Outcomes were self-reported by patients based on predefined questions. The study had  
22 no patient advisers. Due to the nature of this validation study, feedback regarding the results  
23 was not planned for those involved.  
24  
25  
26  
27

## 28 29 **RESULTS**

### 30 31 **Demographic and clinical data**

32 The questionnaire was returned by 143 patients of 342 yielding a response rate of 42%. Clinical  
33 and demographic characteristics are presented in Table 1. The mean age of the participants was  
34 48.9 years (SD 11.9) (range 19-65). The mean HbA1c for the participants was 7.6% (60  
35 mmol/mol) (SD 1.2). The mean duration of diabetes was 17.9 years (SD 12.9) (range 1 – 54  
36 years). In total, 117 patients (82%) agreed to the second assessment. The non-participants  
37 (n=197) were younger than the participants (mean age 45.15 vs. 48.9, p=0.006), and a larger  
38 proportion was male compared to the participants. The mean score for the PAID-5 in this study  
39 sample was 5.3 (SD=4.3) and individual scores ranged from 0–19.  
40  
41  
42  
43  
44  
45  
46  
47  
48

### 49 **Validity**

#### 50 51 **Construct validity**

52 A CFA for PAID-5 was carried out for 141 patients (Table 2). We hypothesized a one-factor  
53 model for PAID-5. After allowing the correlation between error terms between items 3 and  
54 16, the overall  $\chi^2 = 6.0$ ,  $df = 4$  (p-value of 0.195), showed a good model fit. Additional indices  
55 resulted as follows: RMSEA = 0.061, CFI = 0.995, GFI = 0.984 and SRMR = 0.024, NFI=  
56 0.984, CMIN/DF=1.51, showing excellent fit.  
57  
58  
59  
60

## Convergent and discriminant validity

There was a significant moderate correlation between the PAID-5 total score and HFS worry scale ( $r=0.598$ ,  $p < 0.001$ ). There was also a weak positive correlation between the PAID-5 scale and HAD depression scale ( $r=0.380$ ,  $p < 0.001$ ). Convergent validity was also confirmed by a negative correlation between the PAID-5 and WHO-5 scale ( $r=-0.363$ ,  $p < 0.001$ ) and the perception of general health ( $r=-0.420$ ,  $p < 0.001$ ). The PAID-5 total score also correlated significantly with the PAID-20 total score ( $r=0.923$ ,  $p < 0.001$ ).

There was no significant difference in PAID-5 scores between persons with type 1 diabetes (mean=5.59, SD=4.58) and persons with type 2 diabetes (mean=4.95, SD=3.93,  $p=0.38$ ). There was also no significant difference in PAID-5 mean scores between those who reported having diabetes long-term complications (mean=5.75, SD=0.7) and those not having these complications (mean=5.2, SD=4.4,  $t(140) = 0.61$ ,  $p=0.54$ ). Diabetes-related distress mean scores approached statistical significance when comparing patients who reported having retinopathy (7.2, SD=4.0) versus those without retinopathy (mean=5.1, SD=4.2,  $p=0.06$ ). Although women scored higher on the PAID-5 (mean=5.9, SD=4.6) than men (mean=4.86, SD=4.01), the difference was not significant ( $p=0.15$ ).

Patients who had experienced episodes of serious hypoglycemia in the past 6 months had a significantly higher PAID-5 mean score (7.5 (SD= 4.95) versus those who had not had these episodes (5.0, SD=4.2, ( $p=0.043$ ). There were no significant differences in the PAID-5 mean scores for the three different treatment groups: insulin ( $n=87$ ), oral medication ( $n=28$ ) or both ( $n=27$ ) ( $p=0.90$ ). There were no significant correlations with higher age and longer duration of diabetes. Higher HbA1c was positively correlated with higher PAID-5 mean scores, but the correlation was weak ( $r=0.14$ ) and not significant ( $p=0.16$ ).

## Reliability

### Internal consistency and test-retest reliability

The Cronbach's  $\alpha$  for the PAID-5 scale was 0.89. Inter-item correlations for the PAID-5 scale ranged from 0.49 to 0.74. The test-retest reliability of the PAID-5 was assessed in 92 participants who returned the repeat questionnaire, and resulted in an ICC of 0.81 (95% CI=0.70– 0.87,  $p < 0.001$ ).

## DISCUSSION

The results of the current study demonstrate satisfactory psychometric properties of the short form of the PAID-5 in Norwegian adult patients with type 1 and type 2 diabetes. Our findings provide evidence for a one-factor structure for the PAID-5 scale, enabling the assessment of diabetes-related emotional distress. Convergent validity was demonstrated by statistically significant moderate correlations with other concept-related PROMs. The PAID-5 scale showed good internal consistency and a stable test-retest reliability among patients with type 1 and type 2 diabetes across three different clinics in Norway. The instrument might be considered as a supplement to guide consultations, or as a screening instrument in registries and/or population health databases. Use of this tool may increase knowledge on the prevalence of diabetes-related emotional distress, and thus inform guidelines for health care professionals and future interventions.

The Norwegian version of the PAID-5 clearly demonstrated a one-factor structure as postulated. The psychometric results in the current study lend support to findings from two previous validation studies on the PAID-5 scale [16, 19]. In Asia, the Korean version of the PAID-5 enabled a one factor model and demonstrated excellent goodness-of-fit indices after the modification with the error of terms between items 3 and 6 [17]. Our CFA among Norwegians showed excellent goodness-of-fit indices after model modification with the covariance of error terms between items 3 and 16. Therefore, it seems that the instrument enables the assessment of diabetes-related emotional distress, although one data driven modification was needed that may have inflated the model fit.

The present study showed that the PAID-5 correlated positively with fear of hypoglycemia (HFS) and symptoms of depression (HADS-D), and negatively with emotional well-being (WHO-5) and ones' general health perception (RAND-36), which emphasizes good convergent validity. When diabetes-related stress increases, emotional well-being and perception of ones' general health decreases, as expected [16, 26, 27]. Previously, McGuire et al. [16] demonstrated the relationship between the PAID-5 scale and the WHO-5 scale. However, there is limited evidence showing relationships with concepts of fear of hypoglycemia and symptoms of depression. We demonstrated this in the current study, emphasizing the usefulness of this brief questionnaire.

1  
2  
3  
4  
5 The PAID-5 scale discriminates well among those who had experienced episodes of serious  
6 hypoglycemia in the past 6 months compared to those who had not had hypoglycemia. The  
7 study population in general experienced a low level of diabetes-related emotional distress, as  
8 the mean score on the PAID-5 for the study population was 5.3 (SD=4.3). However, individual  
9 scores ranged from 0–19, indicating that there were patients with a high level of diabetes-related  
10 emotional distress. Relationships between the PAID-5 scale and other subgroups were weak  
11 and non-significant. For example, women scored higher on the PAID-5 scale as expected, but  
12 this difference was not significant, probably due to the relatively small sample size as in the  
13 previous study conducted in Iceland [37]. There were no significant differences between the  
14 mean PAID-5 scores for the three different treatment groups (insulin, oral medication or both)  
15 ( $p=0.90$ ). Our relatively small sample size might be the reason, but it is also possible that type  
16 of treatment is not the main reason for a higher burden of diabetes distress. On the other hand,  
17 a higher HbA1c (as a measure of metabolic control), might be a better marker as higher HbA1c  
18 was positively correlated with PAID-5 mean scores in this study (NS) as well as in previous  
19 research [15]. However, future studies specifically designed to answer these questions (e.g., by  
20 use of stratified sampling or by using latent class analyses) with large sample sizes are needed  
21 to test for discrimination between different subgroups.  
22  
23  
24  
25  
26  
27  
28  
29  
30  
31  
32  
33

34  
35 In the current study, the mean diabetes duration of the study population was 17.1 years and  
36 metabolic control was generally close to the treatment goals, as 50 % of the participants in the  
37 subgroup had a HbA1c value of  $\leq 7.3$  % (56 mmol/mol). In the current study, the PAID-5 scale  
38 did not discriminate between groups, such as patients with and without diabetes-related long-  
39 term complications. This might be a consequence of the relatively low number of people with  
40 complications. Nevertheless, the proportion of diabetes long-term complications seems  
41 reasonable for this patient group and is in line with previous research in Norway [15, 38].  
42  
43  
44  
45  
46  
47

48 Metabolic control (HbA1c measurements) was positively, but only weakly correlated with  
49 PAID-5. This is consistent with results from PAID-20 validation studies, where diabetes-related  
50 emotional distress and glycaemic control have shown to be positively correlated - as diabetes  
51 distress increases, HbA1c level also increases [15, 39-41]. Although higher HbA1c values have  
52 been associated with high diabetes-related emotional distress, it should not be taken as self-  
53 evident that patients who are able to maintain an optimum blood sugar feel less distressed.  
54  
55  
56  
57  
58  
59  
60

1  
2  
3 The short-form of the PAID-20, the PAID-5, showed a good internal consistency and test-retest  
4 reliability. This confirms the assumption in previous validation studies that the number of  
5 items in the PAID-20 could be reduced [15]. Our findings and previous studies of the PAID-  
6  
7  
8  
9  
10 5 scale demonstrated good to excellent internal consistency reliability, with Cronbach's  $\alpha$   
11  
12  
13  
14  
15  
16  
17  
18  
19  
20  
21  
22  
23  
24  
25  
26  
27  
28  
29  
30

Diabetes, which is a chronic disease, not only involves making healthy choices in one's  
everyday life, but one must also have the ability to see diabetes and its psychological aspects  
as a larger and more complex picture with many different challenges throughout life. Diabetes  
self-management training is closely connected to how patients understand the nature of the  
disease and its management, thus reducing different fears (e.g., fear of hypoglycemia), guilt and  
frustration, and at the same time increasing skills in managing diabetes self-care and medication  
adherence [7].

### Strengths and limitations

In this well-defined sample of patients across three clinics, the Norwegian PAID-5 was shown  
to be a reliable and valid short questionnaire for assessing diabetes-related distress among  
people with type 1 or type 2 diabetes. Although the scale has demonstrated good psychometric  
properties, this study has limitations. Type of diabetes and metabolic control (HbA<sub>1c</sub>) were  
received from the patient's medical record. However, other clinical characteristics such as  
diabetes complications were self-reported by the patient, which may cause inaccuracies [33].  
Second, the non-responders were younger than the participants, which calls for caution when  
interpreting the results for younger adults with diabetes. Third, the information about the study  
and the request for participation was sent by mail. The distribution method in this study has  
probably contributed to a relatively low response rate. However, we had enough power to  
investigate the one-dimensional scale structure with a CFA. Nevertheless, the sample size  
restricted us in determining if the PAID-5 scale has the ability to discriminate between different  
subgroups. This needs further research in a larger sample. In spite of these limitations, this  
cross-sectional study provides a valid assessment of the psychometric properties of the short  
form of the PAID scale in Norwegian adult patients with type 1 and type 2 diabetes.

### Conclusions

1  
2  
3 In conclusion, the findings from this study provide evidence that the Norwegian version  
4 of the PAID-5 scale is a reliable and valid instrument for assessing diabetes-related  
5 emotional distress among patients with type 1 and type 2 diabetes in Norway, although  
6 its ability to discriminate between groups needs to be tested further in a larger sample.  
7  
8 The scale has only five items and has the potential to guide communication in one-on-  
9 one consultations. Although this validation study was conducted among patients  
10 visiting their doctor or a diabetes nurse in specialty health care, the PAID-5  
11 questionnaire is also relevant to use in primary health care.  
12  
13  
14  
15  
16  
17  
18  
19  
20  
21  
22  
23  
24  
25

### 26 **Acknowledgements**

27  
28 The author would like to thank the patients who agreed to participate in the study.  
29  
30  
31  
32  
33

### 34 **Funding**

35 The authors received no specific funding for this work.  
36  
37  
38

### 39 **Patient consent**

40 Obtained.  
41  
42  
43

### 44 **Conflict of interest**

45 None declared  
46  
47  
48

### 49 **Contributor ship statement**

50  
51 MV contributed to the study concept, project planning and management, recruitment of  
52 participants, data analysis, manuscript preparation, drafting the manuscript and approved the  
53 final manuscript. AB contributed to the study concept, project planning, manuscript  
54 preparation, drafting the manuscript and approved the final manuscript. JI contributed to data  
55 analysis, manuscript preparation, drafting the manuscript and approved the final manuscript.  
56  
57 AV contributed to the study concept, manuscript preparation, drafting the manuscript, and  
58  
59  
60



1  
2  
3 approved the final manuscript. MMI contributed to the study concept, project planning and  
4 management, data analysis, manuscript preparation, drafting the manuscript and approved the  
5 final manuscript.  
6  
7  
8  
9

### 10 **Data sharing statement**

11 No additional data available.  
12  
13  
14  
15

### 16 **References**

- 17 1. International Diabetes Federation (2017) *IDF Diabetes Atlas*. 8. edition.
- 18 2. Ruiz PL, Stene LC, Bakken IJ, Håberg SE, Birkeland KI, Gulseth HL. Decreasing  
19 incidence of pharmacologically and non-pharmacologically treated type 2 diabetes in  
20 Norway: a nationwide study. *Diabetologia*. 2018:1-9.
- 21 3. Skrivarhaug T, Stene LC, Drivvoll AK, Strøm H, Joner G, Group NCDS. Incidence of  
22 type 1 diabetes in Norway among children aged 0–14 years between 1989 and 2012:  
23 has the incidence stopped rising? Results from the Norwegian Childhood Diabetes  
24 Registry. *Diabetologia*. 2014;57(1):57-62
- 25 4. Diabetes Control and Complications Trial Research Group (1993). The effect of  
26 intensive treatment of diabetes on the development and progression of long-term  
27 complications in insulin-dependent diabetes mellitus. *N Engl J Med*, 1993(329), 977-  
28 986.
- 29 5. UK Prospective Diabetes Study (UKPDS) Group (1998). Intensive blood-glucose  
30 control with sulphonylureas or insulin compared with conventional treatment and risk  
31 of complications in patients with type 2 diabetes (UKPDS 33). *The lancet*, 352(9131),  
32 837-853.
- 33 6. Nicolucci, A., Kovacs Burns, K., Holt, R. I., Comaschi, M., Hermanns, N., Ishii, H., . .  
34 . Peyrot, M; DAWN2 Study Group. (2013). Diabetes Attitudes, Wishes and Needs  
35 second study (DAWN2): cross-national benchmarking of diabetes-related  
36 psychosocial outcomes for people with diabetes. *Diabet Med*, 30(7), 767-777.
- 37 7. Rubin, R., & Peyrot, M. (2001). Psychological issues and treatments for people with  
38 diabetes. *Journal of Clinical Psychology*, 57(4), 457-478. doi:10.1002/jclp.1041
- 39 8. Fisher, L., Gonzalez, J. S., & Polonsky, W. H. (2014). The confusing tale of  
40 depression and distress in patients with diabetes: a call for greater clarity and  
41 precision. *31*, 764-772.
- 42  
43  
44  
45  
46  
47  
48  
49  
50  
51  
52  
53  
54  
55  
56  
57  
58  
59  
60

- 1  
2  
3 9. Fisher, L., Skaff, M., Mullan, J., Arean, P., Glasgow, R., & Masharani, U. (2008). A  
4 longitudinal study of affective and anxiety disorders, depressive affect and diabetes  
5 distress in adults with Type 2 diabetes. *Diabetic Medicine*, 25(9), 1096-1101.  
6  
7
- 8 10. Fisher, L., Mullan, J. T., Arean, P., Glasgow, R. E., Hessler, D., & Masharani, U.  
9 (2010). Diabetes distress but not clinical depression or depressive symptoms is  
10 associated with glycemic control in both cross-sectional and longitudinal analyses.  
11 *Diabetes care*, 33(1), 23-28.  
12  
13
- 14 11. Fisher, L., Polonsky, W., Hessler, D. & Potter, M. (2017). A practical framework for  
15 encouraging and supporting positive behaviour change in diabetes. *Diabetic Medicine*.  
16  
17
- 18 12. American Diabetes Association (2016). American Diabetes Association Standards of  
19 Medical Care - 2016. *Diabetes care: the journal of clinical and applied research and*  
20 *education*, 39(1).  
21  
22
- 23 13. Sturt, J., Dennick, K., Due-Christensen, M., McCarthy, K. (2015). The detection and  
24 management of diabetes distress in people with type 1 diabetes. *Current diabetes*  
25 *reports*, 15(11): p. 101.  
26  
27
- 28 14. Polonsky, W. H., Anderson, B. J., Lohrer, P. A., Welch, G., Jacobson, A. M., Aponte,  
29 J. E., & Schwartz, C. E. (1995). Assessment of diabetes-related distress. *Diabetes*  
30 *Care*, 18(6), 754-760.  
31  
32
- 33 15. Graue, M., Haugstvedt, A., Wentzel-Larsen, T., Iversen, M. M., Karlsen, B., & Rokne,  
34 B. (2012). Diabetes-related emotional distress in adults: Reliability and validity of the  
35 Norwegian versions of the Problem Areas in Diabetes Scale (PAID) and the Diabetes  
36 Distress Scale (DDS). *International Journal of Nursing Studies*, 49(2), 174-182.  
37  
38
- 39 16. McGuire, B., Morrison, T., Hermanns, N., Skovlund, S., Eldrup, E., Gagliardino, J., . .  
40 . Rodríguez-Saldaña, J. (2010). Short-form measures of diabetes-related emotional  
41 distress: the Problem Areas in Diabetes Scale (PAID)-5 and PAID-1. *Diabetologia*,  
42 53(1), 66-69.  
43  
44
- 45 17. Lee, E. H., Lee, Y. W., Lee, K. W., Kim, Y. S., & Nam, M. S. (2014). Measurement  
46 of diabetes-related emotional distress using the Problem Areas in Diabetes scale:  
47 psychometric evaluations show that the short form is better than the full form. *Health*  
48 *& Quality of Life Outcomes*, 12, 142.  
49  
50
- 51 18. Esbitt, S. A., Tanenbaum, M. L., & Gonzalez, J. S. (2013). Disentangling Clinical  
52 Depression from Diabetes-Specific Distress: Making Sense of the Mess We've Made  
53 *Screening for depression and other psychological problems in diabetes* (pp. 27-46).  
54 London: Springer.  
55  
56  
57  
58  
59  
60

19. Lee, J., Lee, E.-H., Kim, C.-J., & Moon, S. H. (2015). Diabetes-related emotional distress instruments: A systematic review of measurement properties. *International journal of nursing studies*, 52(12), 1868-1878.
20. Thulin LBB, Iversen MM, Hanestad BR. Translation and cultural adaptation of audit of diabetes dependence quality of life (ADDQoL) into Norwegian. *Vård I Norden*. 2008;28(2):53-6.
21. Wolf, E. J., Harrington, K. M., Clark, S. L., & Miller, M. W. (2013). Sample size requirements for structural equation models an evaluation of power, bias, and solution propriety. *Educational and Psychological Measurement*, 73(6), 913-934.
22. Hays, R. D., & Morales, L. S. (2001). The RAND-36 measure of health-related quality of life. *Annals of Medicine*, 2001, Vol.33(5), p.350-357, 33(5), 350-357.
23. Zigmond, A. S., & Snaith, R. P. (1983). The hospital anxiety and depression scale. *Acta psychiatrica scandinavica*, 67(6), 361-370.
24. Bjelland, I., Dahl, A.A., Haug, T.T. & Neckelmann, D. (2002). The validity of the Hospital Anxiety and Depression Scale. An updated literature review. *J Psychosom*, 52 (2), 69-77.
25. Mykletun, A., Stordal, E., & Dahl, A. A. (2001). Hospital Anxiety and Depression (HAD) scale: factor structure, item analyses and internal consistency in a large population. *The British journal of psychiatry*, 179(6), 540-544.
26. Hajos, T., Pouwer, F., Skovlund, S., Den Oudsten, B., Geelhoed-Duijvestijn, P., Tack, C., & Snoek, F. (2013). Psychometric and screening properties of the WHO-5 well-being index in adult outpatients with Type 1 or Type 2 diabetes mellitus. *Diabetic Medicine*, 30(2), e36 - e69.
27. Topp CW, Ostergaard SD, Sondergaard S, Bech P. The WHO-5 Well-Being Index: a systematic review of the literature. *Psychother Psychosom* 2015; 84: 167-176
28. Gonder-Frederick, L. A., Schmidt, K. M., Vajda, K. A., Greear, M. L., Singh, H., Shepard, J. A., & Cox, D. J. (2011). Psychometric properties of the hypoglycemia fear survey-II for adults with type 1 diabetes. *Diabetes Care*, 34(4), 801-806.
29. Welch, G., Weinger, K., Anderson, B. & Polonsky, W.H. (2003). Responsiveness of the Problem Areas In Diabetes (PAID) questionnaire. *Diabetic Medicine*, 20(1), 69-72.
30. Graue, M., Iversen, M. M., Wentzel-Larsen, T., Rokne, B., & Haugstvedt, A. (2013). Assessing fear of hypoglycemia among adults with type 1 diabetes - psychometric

- properties of the Norwegian version of the Hypoglycemia Fear Survey II questionnaire. *Norsk epidemiologi*, 23(1), 75-81.
31. Hooper, D., Coughlan, J., & Mullen, M. (2008). Structural equation modelling: Guidelines for determining model fit. *Articles*, 2.
32. Hu, L., & Bentler, P. M. (1999). Cutoff criteria for fit indexes in covariance structure analysis: Conventional criteria versus new alternatives. *A Multidisciplinary Journal*, 6(1), 1-55.
33. Polit, D. F., & Beck, C. T. (2012). *Nursing research: generating and assessing evidence for nursing practice* (9 ed.). Philadelphia, Pa: Wolters Kluwer Health.
34. Fayers, P. M., & Machin, D. (2007). *Quality of life: the assessment, analysis and interpretation of patient-reported outcomes* (2 ed.). Chichester: John Wiley.
35. Mykletun, A., E. Stordal, and A.A. Dahl, *Hospital Anxiety and Depression (HAD) scale: factor structure, item analyses and internal consistency in a large population. The British journal of psychiatry*, 2001. 179(6): p. 540-544.
36. Polit, D. F. (2010). *Statistics and data analysis for nursing research* (2nd ed.). Upper Saddle River, N.J: Pearson.
37. Sigurdardottir, A. K., & Benediktsson, R. (2008). Reliability and validity of the Icelandic version of the Problem Area In Diabetes (PAID) scale. *International Journal of Nursing Studies*, 45(4), 526-533.
38. Iversen, M. M., Midthjell, K., Østbye, T., Tell, G. S., Clipp, E., Sloane, R., . . . Hanestad, B. R. (2008). History of and factors associated with diabetic foot ulcers in Norway: the Nord-Trøndelag Health Study. *Scandinavian Journal of Social Medicine*, 36(1), 62-68.
39. Papathanasiou, A., Koutsovasilis, A., Shea, S., Philalithis, A., Papavasiliou, S., Melidonis, A., & Lionis, C. (2014). The Problem Areas in Diabetes (PAID) scale: psychometric evaluation survey in a Greek sample with type 2 diabetes. *Journal of Psychiatric & Mental Health Nursing*, 21(4), 345-353.
40. Beléndez, M., Hernández-Mijares, A., Marco, J., Domínguez, J. R., & Pomares, F. J. (2014). Validation of the Spanish version of the Problem Areas in Diabetes (PAID-SP) Scale. *Diabetes Research & Clinical Practice*, 106(3), e93-e95.
41. Amsberg, S., Wredling, R., Lins, P., Adamson, U., & Johansson, U. (2008). The psychometric properties of the Swedish version of the Problem Areas in Diabetes Scale (Swe-PAID-20): scale development. *International Journal of Nursing Studies*, 45(9), 1319-1328.

- 1  
2  
3 42. Nicolucci, A., Rossi, M., Pellegrini, F., Lucisano, G., Pintaudi, B., Gentile, S., . . .  
4  
5 Vespasiani, G. (2014). Benchmarking network for clinical and humanistic outcomes in  
6  
7 diabetes (BENCH-D) study: protocol, tools, and population. *SpringerPlus*, 3(1), 1-9.  
8  
9  
10  
11  
12  
13  
14  
15  
16  
17  
18  
19  
20  
21  
22  
23  
24  
25  
26  
27  
28  
29  
30  
31  
32  
33  
34  
35  
36  
37  
38  
39  
40  
41  
42  
43  
44  
45  
46  
47  
48  
49  
50  
51  
52  
53  
54  
55  
56  
57  
58  
59  
60

For peer review only

**Table 1.** Demographic and clinical characteristics of the study population

| Characteristics                                             | Total sample    |
|-------------------------------------------------------------|-----------------|
| <i>Demographic variables</i>                                |                 |
| Age (years), mean $\pm$ SD                                  | 48.9 $\pm$ 11.9 |
| Male sex                                                    | 78 (54.5)       |
| <i>Clinical variables</i>                                   |                 |
| Type of diabetes                                            |                 |
| Type 1                                                      | 87 (60.8)       |
| Type 2                                                      | 56 (39.2)       |
| HbA <sub>1c</sub> (%), mean $\pm$ SD <sup>a, b</sup>        | 7.6 $\pm$ 1.2   |
| HbA <sub>1c</sub> (mmol/mol), mean $\pm$ SD <sup>a, b</sup> | 60 $\pm$ 13     |
| Diabetes duration (years), mean $\pm$ SD                    | 17.1 $\pm$ 12.9 |
| Type of treatment                                           |                 |
| Insulin                                                     | 88 (61.5)       |
| Oral medication                                             | 28 (19.6)       |
| Insulin and oral medication                                 | 27 (18.9)       |
| Episodes of serious hypoglycemia                            |                 |
| 1-3 times in the past 6 months                              | 16 (11.2)       |
| Self-reported complications                                 |                 |
| Presence of one or more late complications <sup>c</sup>     | 32 (22.4)       |

Data are shown as *n* (%). Percent of patients with valid values for categorical variables and mean  $\pm$  SD (Standard Deviation) for continuous variables.

<sup>a</sup> HbA<sub>1c</sub> (glycated hemoglobin) measurements were reported using the International Federation of Clinical Chemistry units (mmol/mol) in addition to the derived NGSP units (%)

<sup>b</sup> *n* = 100, HbA<sub>1c</sub> values older than 8 weeks a prior and more than 12 weeks after filling out the survey were excluded.

<sup>c</sup> Retinopathy, cardiovascular diseases or foot ulcers

**Table 2.** Factor loadings and goodness-of-fit indices for the PAID-5 one-factor solutions

|                       | Model 1      | Model 2     |
|-----------------------|--------------|-------------|
| Standardized loadings |              |             |
| Item 3                | 0.83         | 0.85        |
| Item 6                | 0.86         | 0.85        |
| Item 12               | 0.82         | 0.80        |
| Item 16               | 0.68         | 0.72        |
| Item 19               | 0.73         | 0.72        |
| AVE                   | 0.62         | 0.63        |
| Composite reliability | 0.76         | 0.76        |
| Df                    | 5            | 4           |
| $\chi^2$ (p)          | 14.85 (0.11) | 6.0 (0.195) |
| CFI                   | 0.974        | 0.995       |
| GFI                   | 0.961        | 0.984       |
| SRMR                  | 0.035        | 0.024       |
| RMSEA                 | 0.119        | 0.061       |
| CMIN/DF               | 2.971        | 1.51        |
| NFI                   | 0.962        | 0.984       |

Model 1: One-factor CFA, Model 2: One-factor CFA with covariance of error terms between item 3 and 16

$\chi^2$  (p): Model Chi-Square, Df: degrees of freedom; CFI: comparative fit index (good fit > 0.95). GFI: goodness of fit index (good fit > 0.90); SRMR: standardized root mean square residual (good fit <0.08). RMSEA: root mean square error of approximation (acceptable fit <0.08); CMIN/DF: ratio of chi square value to the degrees of freedom (<3); NFI: normed fit index (good fit > 0.95);

**Table S1.** Questions included in the PAID-5 questionnaire

| Questions |                                                                                             |
|-----------|---------------------------------------------------------------------------------------------|
| 3         | “Feeling scared when you think about living with diabetes?”                                 |
| 6         | “Feeling depressed when you think about living with diabetes?”                              |
| 12        | “Worrying about the future and the possibility of serious complications?”                   |
| 16        | “Feeling that diabetes is taking up too much of your mental and physical energy every day?” |
| 19        | “Coping with complications of diabetes?”                                                    |

For peer review only



## STROBE Statement—checklist of items that should be included in reports of observational studies

|                              | Item No | Recommendation                                                                                                                                                                                                                                                                                                                                                                                                                                                         | Page No |
|------------------------------|---------|------------------------------------------------------------------------------------------------------------------------------------------------------------------------------------------------------------------------------------------------------------------------------------------------------------------------------------------------------------------------------------------------------------------------------------------------------------------------|---------|
| <b>Title and abstract</b>    | 1       | (a) Indicate the study's design with a commonly used term in the title or the abstract                                                                                                                                                                                                                                                                                                                                                                                 | 1       |
|                              |         | (b) Provide in the abstract an informative and balanced summary of what was done and what was found                                                                                                                                                                                                                                                                                                                                                                    | 2       |
| <b>Introduction</b>          |         |                                                                                                                                                                                                                                                                                                                                                                                                                                                                        |         |
| Background/rationale         | 2       | Explain the scientific background and rationale for the investigation being reported                                                                                                                                                                                                                                                                                                                                                                                   | 4-5     |
| Objectives                   | 3       | State specific objectives, including any prespecified hypotheses                                                                                                                                                                                                                                                                                                                                                                                                       | 5       |
| <b>Methods</b>               |         |                                                                                                                                                                                                                                                                                                                                                                                                                                                                        |         |
| Study design                 | 4       | Present key elements of study design early in the paper                                                                                                                                                                                                                                                                                                                                                                                                                | 5       |
| Setting                      | 5       | Describe the setting, locations, and relevant dates, including periods of recruitment, exposure, follow-up, and data collection                                                                                                                                                                                                                                                                                                                                        | 6-7     |
| Participants                 | 6       | (a) <i>Cohort study</i> —Give the eligibility criteria, and the sources and methods of selection of participants. Describe methods of follow-up<br><i>Case-control study</i> —Give the eligibility criteria, and the sources and methods of case ascertainment and control selection. Give the rationale for the choice of cases and controls<br><i>Cross-sectional study</i> —Give the eligibility criteria, and the sources and methods of selection of participants | 6       |
|                              |         | (b) <i>Cohort study</i> —For matched studies, give matching criteria and number of exposed and unexposed<br><i>Case-control study</i> —For matched studies, give matching criteria and the number of controls per case                                                                                                                                                                                                                                                 |         |
| Variables                    | 7       | Clearly define all outcomes, exposures, predictors, potential confounders, and effect modifiers. Give diagnostic criteria, if applicable                                                                                                                                                                                                                                                                                                                               | 6-7     |
| Data sources/<br>measurement | 8*      | For each variable of interest, give sources of data and details of methods of assessment (measurement). Describe comparability of assessment methods if there is more than one group                                                                                                                                                                                                                                                                                   | 6-7     |
| Bias                         | 9       | Describe any efforts to address potential sources of bias                                                                                                                                                                                                                                                                                                                                                                                                              | 6-7     |
| Study size                   | 10      | Explain how the study size was arrived at                                                                                                                                                                                                                                                                                                                                                                                                                              | 6       |
| Quantitative variables       | 11      | Explain how quantitative variables were handled in the analyses. If applicable, describe which groupings were chosen and why                                                                                                                                                                                                                                                                                                                                           | 8       |
| Statistical methods          | 12      | (a) Describe all statistical methods, including those used to control for confounding                                                                                                                                                                                                                                                                                                                                                                                  |         |
|                              |         | (b) Describe any methods used to examine subgroups and interactions                                                                                                                                                                                                                                                                                                                                                                                                    | 8       |
|                              |         | (c) Explain how missing data were addressed                                                                                                                                                                                                                                                                                                                                                                                                                            | 8       |
|                              |         | (d) <i>Cohort study</i> —If applicable, explain how loss to follow-up was addressed<br><i>Case-control study</i> —If applicable, explain how matching of cases and controls was addressed<br><i>Cross-sectional study</i> —If applicable, describe analytical methods taking account of sampling strategy                                                                                                                                                              | 6       |
|                              |         | (e) Describe any sensitivity analyses                                                                                                                                                                                                                                                                                                                                                                                                                                  |         |

| <b>Results</b>           |     |                                                                                                                                                                                                                                                                                                                                                                                                               |       |
|--------------------------|-----|---------------------------------------------------------------------------------------------------------------------------------------------------------------------------------------------------------------------------------------------------------------------------------------------------------------------------------------------------------------------------------------------------------------|-------|
| Participants             | 13* | (a) Report numbers of individuals at each stage of study—eg numbers potentially eligible, examined for eligibility, confirmed eligible, included in the study, completing follow-up, and analysed<br>(b) Give reasons for non-participation at each stage<br>(c) Consider use of a flow diagram                                                                                                               | 9     |
| Descriptive data         | 14* | (a) Give characteristics of study participants (eg demographic, clinical, social) and information on exposures and potential confounders<br>(b) Indicate number of participants with missing data for each variable of interest<br>(c) <i>Cohort study</i> —Summarise follow-up time (eg, average and total amount)                                                                                           | 9     |
| Outcome data             | 15* | <i>Cohort study</i> —Report numbers of outcome events or summary measures over time<br><i>Case-control study</i> —Report numbers in each exposure category, or summary measures of exposure<br><i>Cross-sectional study</i> —Report numbers of outcome events or summary measures                                                                                                                             | 9-10  |
| Main results             | 16  | (a) Give unadjusted estimates and, if applicable, confounder-adjusted estimates and their precision (eg, 95% confidence interval). Make clear which confounders were adjusted for and why they were included<br>(b) Report category boundaries when continuous variables were categorized<br>(c) If relevant, consider translating estimates of relative risk into absolute risk for a meaningful time period | 9-10  |
| Other analyses           | 17  | Report other analyses done—eg analyses of subgroups and interactions, and sensitivity analyses                                                                                                                                                                                                                                                                                                                |       |
| <b>Discussion</b>        |     |                                                                                                                                                                                                                                                                                                                                                                                                               |       |
| Key results              | 18  | Summarise key results with reference to study objectives                                                                                                                                                                                                                                                                                                                                                      | 10-11 |
| Limitations              | 19  | Discuss limitations of the study, taking into account sources of potential bias or imprecision. Discuss both direction and magnitude of any potential bias                                                                                                                                                                                                                                                    | 13    |
| Interpretation           | 20  | Give a cautious overall interpretation of results considering objectives, limitations, multiplicity of analyses, results from similar studies, and other relevant evidence                                                                                                                                                                                                                                    | 13    |
| Generalisability         | 21  | Discuss the generalisability (external validity) of the study results                                                                                                                                                                                                                                                                                                                                         | 12-13 |
| <b>Other information</b> |     |                                                                                                                                                                                                                                                                                                                                                                                                               |       |
| Funding                  | 22  | Give the source of funding and the role of the funders for the present study and, if applicable, for the original study on which the present article is based                                                                                                                                                                                                                                                 | 14    |

\*Give information separately for cases and controls in case-control studies and, if applicable, for exposed and unexposed groups in cohort and cross-sectional studies.

**Note:** An Explanation and Elaboration article discusses each checklist item and gives methodological background and published examples of transparent reporting. The STROBE checklist is best used in conjunction with this article (freely available on the Web sites of PLoS Medicine at <http://www.plosmedicine.org/>, Annals of Internal Medicine at <http://www.annals.org/>, and Epidemiology at <http://www.epidem.com/>). Information on the STROBE Initiative is available at [www.strobe-statement.org](http://www.strobe-statement.org).
