# Supplementary material for: Psychometric properties of the Norwegian version of the short form of The Problem Areas in Diabetes scale (PAID-5): a validation study
Source: PubMed Central journal article supplement — BMJ Open. 2019 Feb 21;9(2):e022903. doi: 10.1136/bmjopen-2018-022903 (PMC6398631; doi:10.1136/bmjopen-2018-022903), 2019-02-21
Supplement: bmjopen-2018-022903supp001.pdf [file bmjopen-2018-022903supp001.pdf]

**Table S1.** Questions included in the PAID-5 questionnaire

---

| Questions |                                                                                             |
|-----------|---------------------------------------------------------------------------------------------|
| 3         | “Feeling scared when you think about living with diabetes?”                                 |
| 6         | “Feeling depressed when you think about living with diabetes?”                              |
| 12        | “Worrying about the future and the possibility of serious complications?”                   |
| 16        | “Feeling that diabetes is taking up too much of your mental and physical energy every day?” |
| 19        | “Coping with complications of diabetes?”                                                    |

---
